# Supplementary material for: High-pressure processing-induced transcriptome response during recovery of Listeria monocytogenes
Source: PubMed Central journal article supplement (PMC7881616; doi:10.1186/s12864-021-07407-6), 2021-02-12

# a) 200 MPa Ortholog Genes

## RO15

## ScottA

log2 fold change

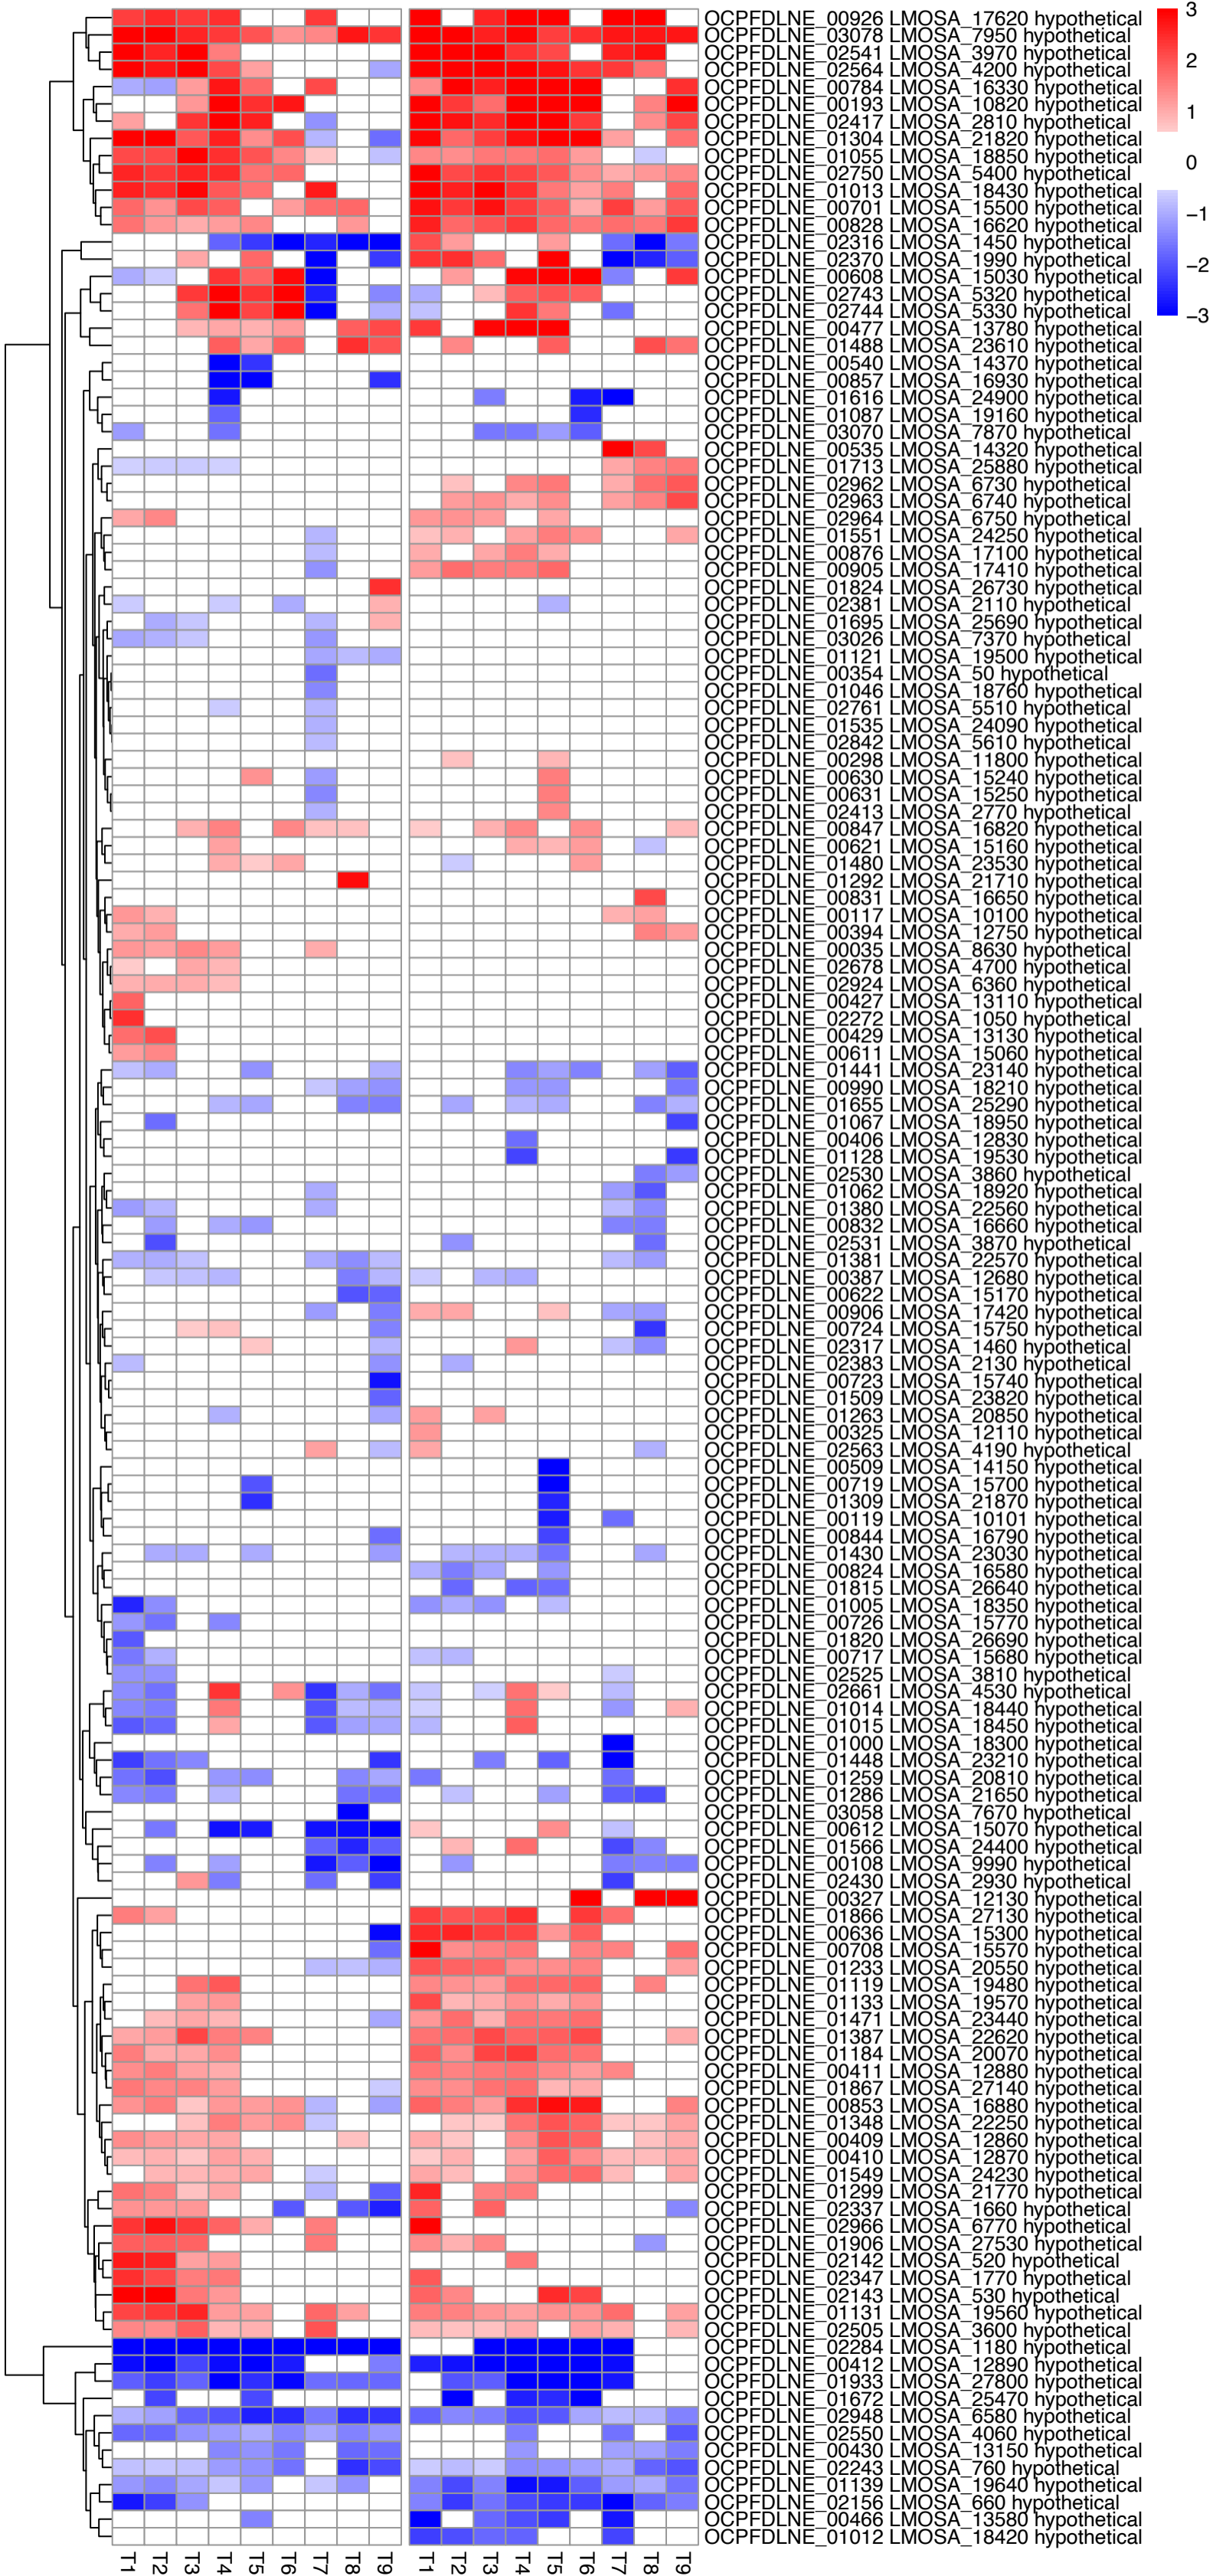

# b) 400 MPa Ortholog Genes

## RO15

## ScottA

log2 fold change

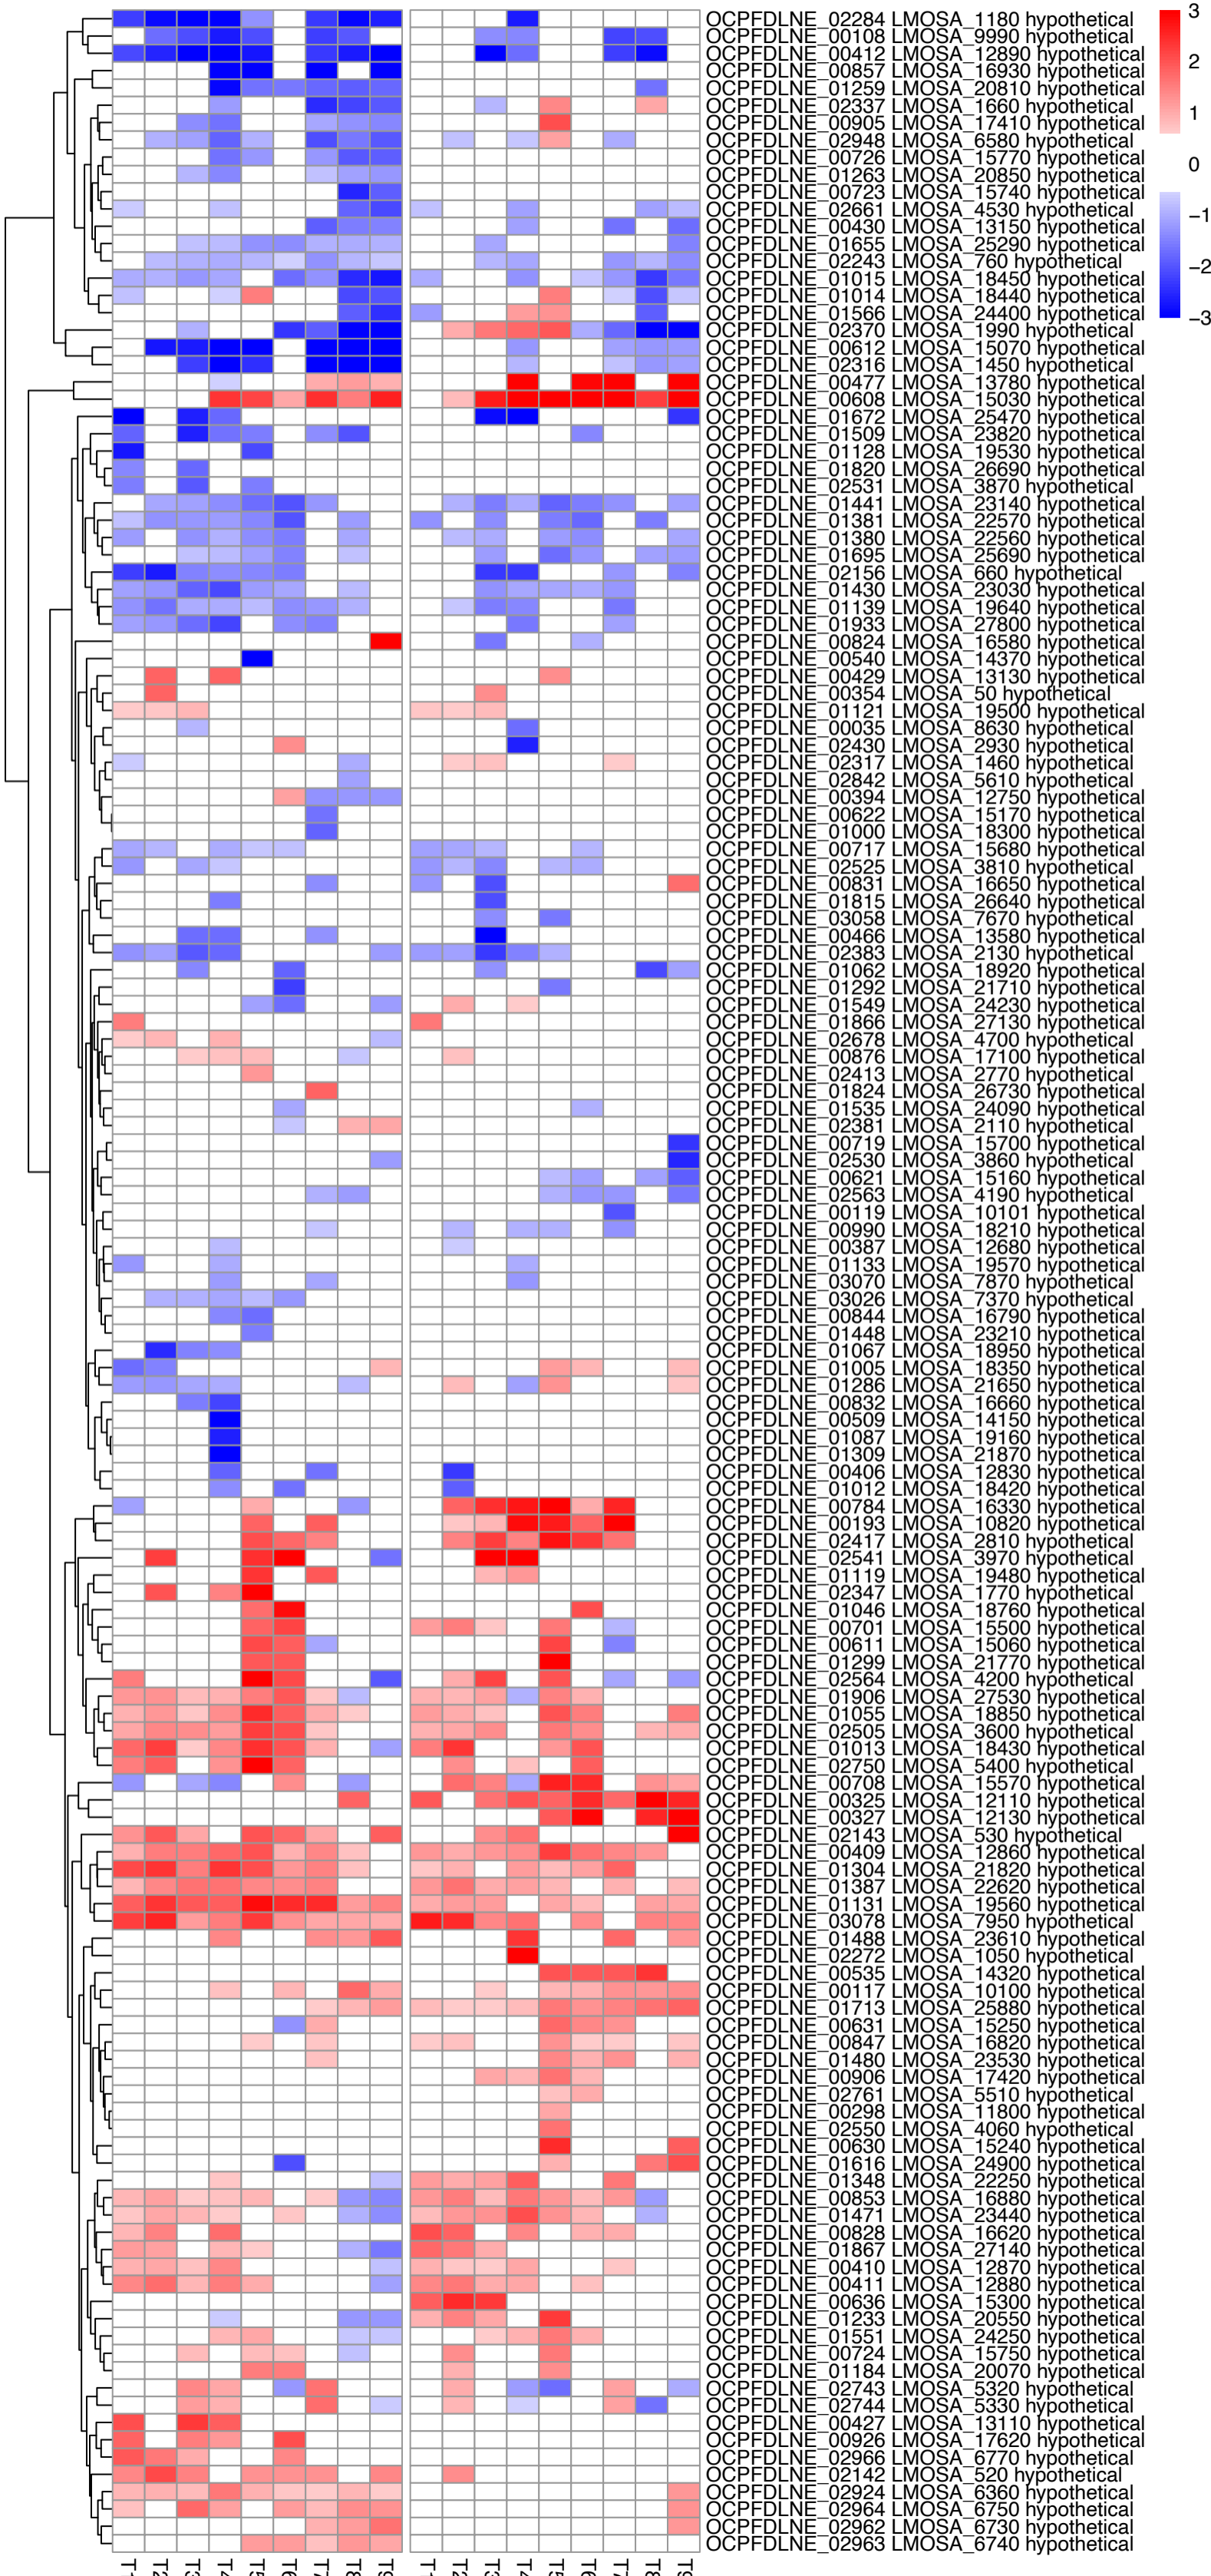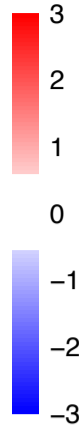

T1

T2

T3

T4

T5

T6

T7

T8

T9

T1

T2

T3

T4

T5

T6

T7

T8

T9

OCPFDLNE\_02284 LMOSA\_1180 hypothetical  
OCPFDLNE\_00108 LMOSA\_9990 hypothetical  
OCPFDLNE\_00412 LMOSA\_12890 hypothetical  
OCPFDLNE\_00857 LMOSA\_16930 hypothetical  
OCPFDLNE\_01259 LMOSA\_20810 hypothetical  
OCPFDLNE\_02337 LMOSA\_1660 hypothetical  
OCPFDLNE\_00905 LMOSA\_17410 hypothetical  
OCPFDLNE\_02948 LMOSA\_6580 hypothetical  
OCPFDLNE\_00726 LMOSA\_15770 hypothetical  
OCPFDLNE\_01263 LMOSA\_20850 hypothetical  
OCPFDLNE\_00723 LMOSA\_15740 hypothetical  
OCPFDLNE\_02661 LMOSA\_4530 hypothetical  
OCPFDLNE\_00430 LMOSA\_13150 hypothetical  
OCPFDLNE\_01655 LMOSA\_25290 hypothetical  
OCPFDLNE\_02243 LMOSA\_760 hypothetical  
OCPFDLNE\_01015 LMOSA\_18450 hypothetical  
OCPFDLNE\_01014 LMOSA\_18440 hypothetical  
OCPFDLNE\_01566 LMOSA\_24400 hypothetical  
OCPFDLNE\_02370 LMOSA\_1990 hypothetical  
OCPFDLNE\_00612 LMOSA\_15070 hypothetical  
OCPFDLNE\_02316 LMOSA\_1450 hypothetical  
OCPFDLNE\_00477 LMOSA\_13780 hypothetical  
OCPFDLNE\_00608 LMOSA\_15030 hypothetical  
OCPFDLNE\_01672 LMOSA\_25470 hypothetical  
OCPFDLNE\_01509 LMOSA\_23820 hypothetical  
OCPFDLNE\_01128 LMOSA\_19530 hypothetical  
OCPFDLNE\_01820 LMOSA\_26690 hypothetical  
OCPFDLNE\_02531 LMOSA\_3870 hypothetical  
OCPFDLNE\_01441 LMOSA\_23140 hypothetical  
OCPFDLNE\_01381 LMOSA\_22570 hypothetical  
OCPFDLNE\_01380 LMOSA\_22560 hypothetical  
OCPFDLNE\_01695 LMOSA\_25690 hypothetical  
OCPFDLNE\_02156 LMOSA\_660 hypothetical  
OCPFDLNE\_01430 LMOSA\_23030 hypothetical  
OCPFDLNE\_01139 LMOSA\_19640 hypothetical  
OCPFDLNE\_01933 LMOSA\_27800 hypothetical  
OCPFDLNE\_00824 LMOSA\_16580 hypothetical  
OCPFDLNE\_00540 LMOSA\_14370 hypothetical  
OCPFDLNE\_00429 LMOSA\_13130 hypothetical  
OCPFDLNE\_00354 LMOSA\_50 hypothetical  
OCPFDLNE\_01121 LMOSA\_19500 hypothetical  
OCPFDLNE\_00035 LMOSA\_8630 hypothetical  
OCPFDLNE\_02430 LMOSA\_2930 hypothetical  
OCPFDLNE\_02317 LMOSA\_1460 hypothetical  
OCPFDLNE\_02842 LMOSA\_5610 hypothetical  
OCPFDLNE\_00394 LMOSA\_12750 hypothetical  
OCPFDLNE\_00622 LMOSA\_15170 hypothetical  
OCPFDLNE\_01000 LMOSA\_18300 hypothetical  
OCPFDLNE\_00717 LMOSA\_15680 hypothetical  
OCPFDLNE\_02525 LMOSA\_3810 hypothetical  
OCPFDLNE\_00831 LMOSA\_16650 hypothetical  
OCPFDLNE\_01815 LMOSA\_26640 hypothetical  
OCPFDLNE\_03058 LMOSA\_7670 hypothetical  
OCPFDLNE\_00466 LMOSA\_13580 hypothetical  
OCPFDLNE\_02383 LMOSA\_2130 hypothetical  
OCPFDLNE\_01062 LMOSA\_18920 hypothetical  
OCPFDLNE\_01292 LMOSA\_21710 hypothetical  
OCPFDLNE\_01549 LMOSA\_24230 hypothetical  
OCPFDLNE\_01866 LMOSA\_27130 hypothetical  
OCPFDLNE\_02678 LMOSA\_4700 hypothetical  
OCPFDLNE\_00876 LMOSA\_17100 hypothetical  
OCPFDLNE\_02413 LMOSA\_2770 hypothetical  
OCPFDLNE\_01824 LMOSA\_26730 hypothetical  
OCPFDLNE\_01535 LMOSA\_24090 hypothetical  
OCPFDLNE\_02381 LMOSA\_2110 hypothetical  
OCPFDLNE\_00719 LMOSA\_15700 hypothetical  
OCPFDLNE\_02530 LMOSA\_3860 hypothetical  
OCPFDLNE\_00621 LMOSA\_15160 hypothetical  
OCPFDLNE\_02563 LMOSA\_4190 hypothetical  
OCPFDLNE\_00119 LMOSA\_10101 hypothetical  
OCPFDLNE\_00990 LMOSA\_18210 hypothetical  
OCPFDLNE\_00387 LMOSA\_12680 hypothetical  
OCPFDLNE\_01133 LMOSA\_19570 hypothetical  
OCPFDLNE\_03070 LMOSA\_7870 hypothetical  
OCPFDLNE\_03026 LMOSA\_7370 hypothetical  
OCPFDLNE\_00844 LMOSA\_16790 hypothetical  
OCPFDLNE\_01448 LMOSA\_23210 hypothetical  
OCPFDLNE\_01067 LMOSA\_18950 hypothetical  
OCPFDLNE\_01005 LMOSA\_18350 hypothetical  
OCPFDLNE\_01286 LMOSA\_21650 hypothetical  
OCPFDLNE\_00832 LMOSA\_16660 hypothetical  
OCPFDLNE\_00509 LMOSA\_14150 hypothetical  
OCPFDLNE\_01087 LMOSA\_19160 hypothetical  
OCPFDLNE\_01309 LMOSA\_21870 hypothetical  
OCPFDLNE\_00406 LMOSA\_12830 hypothetical  
OCPFDLNE\_01012 LMOSA\_18420 hypothetical  
OCPFDLNE\_00784 LMOSA\_16330 hypothetical  
OCPFDLNE\_00193 LMOSA\_10820 hypothetical  
OCPFDLNE\_02417 LMOSA\_2810 hypothetical  
OCPFDLNE\_02541 LMOSA\_3970 hypothetical  
OCPFDLNE\_01119 LMOSA\_19480 hypothetical  
OCPFDLNE\_02347 LMOSA\_1770 hypothetical  
OCPFDLNE\_01046 LMOSA\_18760 hypothetical  
OCPFDLNE\_00701 LMOSA\_15500 hypothetical  
OCPFDLNE\_00611 LMOSA\_15060 hypothetical  
OCPFDLNE\_01299 LMOSA\_21770 hypothetical  
OCPFDLNE\_02564 LMOSA\_4200 hypothetical  
OCPFDLNE\_01906 LMOSA\_27530 hypothetical  
OCPFDLNE\_01055 LMOSA\_18850 hypothetical  
OCPFDLNE\_02505 LMOSA\_3600 hypothetical  
OCPFDLNE\_01013 LMOSA\_18430 hypothetical  
OCPFDLNE\_02750 LMOSA\_5400 hypothetical  
OCPFDLNE\_00708 LMOSA\_15570 hypothetical  
OCPFDLNE\_00325 LMOSA\_12110 hypothetical  
OCPFDLNE\_00327 LMOSA\_12130 hypothetical  
OCPFDLNE\_02143 LMOSA\_530 hypothetical  
OCPFDLNE\_00409 LMOSA\_12860 hypothetical  
OCPFDLNE\_01304 LMOSA\_21820 hypothetical  
OCPFDLNE\_01387 LMOSA\_22620 hypothetical  
OCPFDLNE\_01131 LMOSA\_19560 hypothetical  
OCPFDLNE\_03078 LMOSA\_7950 hypothetical  
OCPFDLNE\_01488 LMOSA\_23610 hypothetical  
OCPFDLNE\_02272 LMOSA\_1050 hypothetical  
OCPFDLNE\_00535 LMOSA\_14320 hypothetical  
OCPFDLNE\_00117 LMOSA\_10100 hypothetical  
OCPFDLNE\_01713 LMOSA\_25880 hypothetical  
OCPFDLNE\_00631 LMOSA\_15250 hypothetical  
OCPFDLNE\_00847 LMOSA\_16820 hypothetical  
OCPFDLNE\_01480 LMOSA\_23530 hypothetical  
OCPFDLNE\_00906 LMOSA\_17420 hypothetical  
OCPFDLNE\_02761 LMOSA\_5510 hypothetical  
OCPFDLNE\_00298 LMOSA\_11800 hypothetical  
OCPFDLNE\_02550 LMOSA\_4060 hypothetical  
OCPFDLNE\_00630 LMOSA\_15240 hypothetical  
OCPFDLNE\_01616 LMOSA\_24900 hypothetical  
OCPFDLNE\_01348 LMOSA\_22250 hypothetical  
OCPFDLNE\_00853 LMOSA\_16880 hypothetical  
OCPFDLNE\_01471 LMOSA\_23440 hypothetical  
OCPFDLNE\_00828 LMOSA\_16620 hypothetical  
OCPFDLNE\_01867 LMOSA\_27140 hypothetical  
OCPFDLNE\_00410 LMOSA\_12870 hypothetical  
OCPFDLNE\_00411 LMOSA\_12880 hypothetical  
OCPFDLNE\_00636 LMOSA\_15300 hypothetical  
OCPFDLNE\_01233 LMOSA\_20550 hypothetical  
OCPFDLNE\_01551 LMOSA\_24250 hypothetical  
OCPFDLNE\_00724 LMOSA\_15750 hypothetical  
OCPFDLNE\_01184 LMOSA\_20070 hypothetical  
OCPFDLNE\_02743 LMOSA\_5320 hypothetical  
OCPFDLNE\_02744 LMOSA\_5330 hypothetical  
OCPFDLNE\_00427 LMOSA\_13110 hypothetical  
OCPFDLNE\_00926 LMOSA\_17620 hypothetical  
OCPFDLNE\_02966 LMOSA\_6770 hypothetical  
OCPFDLNE\_02142 LMOSA\_520 hypothetical  
OCPFDLNE\_02924 LMOSA\_6360 hypothetical  
OCPFDLNE\_02964 LMOSA\_6750 hypothetical  
OCPFDLNE\_02962 LMOSA\_6730 hypothetical  
OCPFDLNE\_02963 LMOSA\_6740 hypothetical







# f) ScottA specific hypothetical genes

## 200 MPa

## 400 MPa

log2 fold change

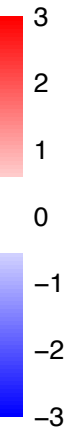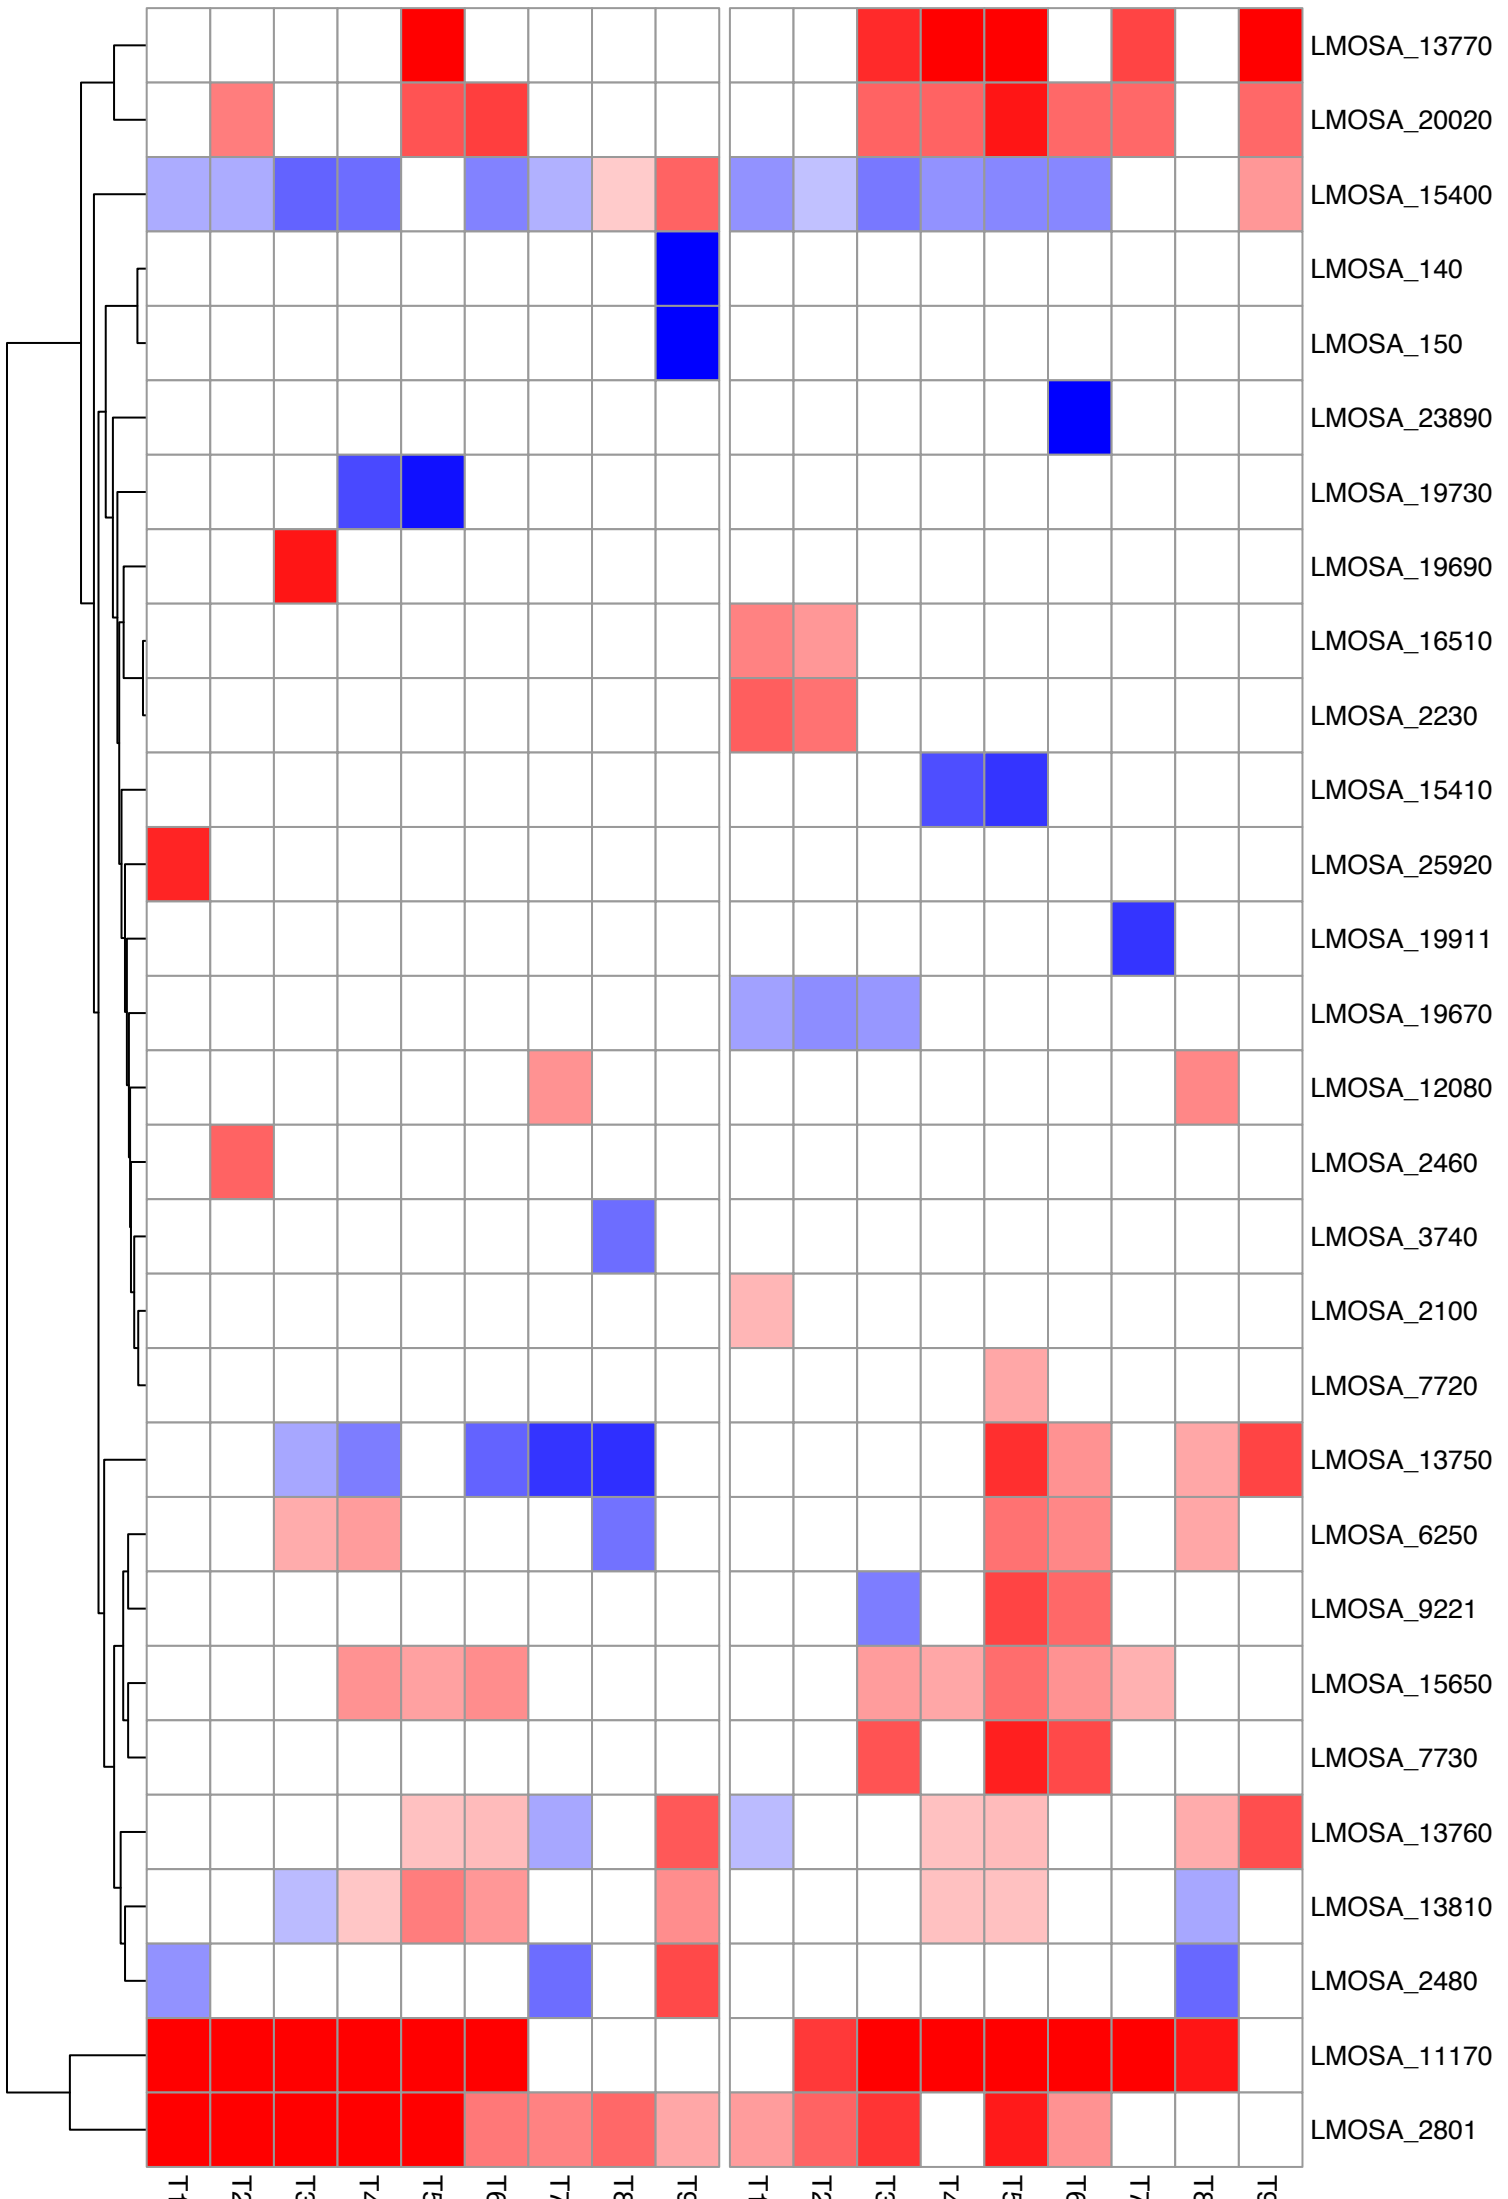

Supplement: 12864_2021_7407_MOESM13_ESM.pdf [file 12864_2021_7407_MOESM13_ESM.pdf]
