# Supplementary material for: High-pressure processing-induced transcriptome response during recovery of Listeria monocytogenes
Source: PubMed Central journal article supplement (PMC7881616; doi:10.1186/s12864-021-07407-6), 2021-02-12

## lmo1013 vs LMOSA\_19040 (ScottA) BLASTP alignment

Query= EGJ24516.1 [locustag:LMOSA\_19040]

Length=293

| Sequences producing significant alignments: | Score (Bits) | E Value |
|---------------------------------------------|--------------|---------|
| lmo1013                                     | 566          | 0.0     |

>lmo1013  
Length=281

Score = 566 bits (1460), Expect = 0.0, Method: Compositional matrix adjust.  
Identities = 279/281 (99%), Positives = 281/281 (100%), Gaps = 0/281 (0%)

|       |     |                                                               |     |
|-------|-----|---------------------------------------------------------------|-----|
| Query | 13  | MNLLKKWFSSIDWDQFWNHIIISVGIKIAILIALYFIFRVVGNKIIRSFFRKYRQQQAVSV | 72  |
|       |     | MNLLKKWFSSIDWDQFWNHIIISVGIKIAILIALYFIFRV+GNKIIRSFFRKYRQQQAVSV |     |
| Sbjct | 1   | MNLLKKWFSSIDWDQFWNHIIISVGIKIAILIALYFIFRVIGNKIIRSFFRKYRQQQAVSV | 60  |
| Query | 73  | GRADTLESLISNFYGYVLFFFTFAILLQNFMDVTAIISAGVASLAIAFGAQGLVSDVVT   | 132 |
|       |     | GRADTLESLISNFYGYVLFFFTFAILLQNFMDVTAIISAGVASLAIAFGAQGLVSDVVT   |     |
| Sbjct | 61  | GRADTLESLISNFYGYVLFFFTFAILLQNFMDVTAIISAGVASLAIAFGAQGLVSDVVT   | 120 |
| Query | 133 | GFFILLERQLDVGDTITIGLVNGTVEALGLRRTTQVRDFDGLHFIPNRQIMVVSNHSGN   | 192 |
|       |     | GFFILLERQLDVGDTITIGLVNGTVEALGLRRTTQVRDFDGLHFIPNRQIMVVSNHSGN   |     |
| Sbjct | 121 | GFFILLERQLDVGDTITIGLVNGTVEALGLRRTTQVRDFDGLHFIPNRQIMVVSNHSGN   | 180 |
| Query | 193 | MRVMVDIQISPHEDEPEKAIKIIGEVCDAKENKNIVEPPVVLGVQNI DATNMIIIRVVGK | 252 |
|       |     | MRVMVDIQISPHEDEPEKAIKIIGEVCDAKENKNIVEPPVVLGVQNI DATNMIIIRVVGK |     |
| Sbjct | 181 | MRVMVDIQISPHEDEPEKAIKIIGEVCDAKENKNIVEPPVVLGVQNI DATNMIIIRVVGK | 240 |
| Query | 253 | AVNGEQYSVQRDLLKDIREALAENEIELPLNFVSTFGPNNN                     | 293 |
|       |     | AVNGEQYSVQRDLLKDIREALAEN+IELPLNFVSTFGPNNN                     |     |
| Sbjct | 241 | AVNGEQYSVQRDLLKDIREALAENKIELPLNFVSTFGPNNN                     | 281 |

## lmo1013 vs OCPFDLNE\_01076 (RO15) BLASTP alignment

Query= OCPFDLNE\_01076

Length=293

| Sequences producing significant alignments: | Score (Bits) | E Value |
|---------------------------------------------|--------------|---------|
| lmo1013                                     | 565          | 0.0     |

>lmo1013  
Length=281

Score = 565 bits (1455), Expect = 0.0, Method: Compositional matrix adjust.  
Identities = 279/281 (99%), Positives = 280/281 (99%), Gaps = 0/281 (0%)

|       |     |                                                               |     |
|-------|-----|---------------------------------------------------------------|-----|
| Query | 13  | MNLLKKWFSSIDWDQFWNHIIISVGIKIAILIALYFIFRVIGNKIIRSFFRKYRQQQAVSV | 72  |
|       |     | MNLLKKWFSSIDWDQFWNHIIISVGIKIAILIALYFIFRVIGNKIIRSFFRKYRQQQAVSV |     |
| Sbjct | 1   | MNLLKKWFSSIDWDQFWNHIIISVGIKIAILIALYFIFRVIGNKIIRSFFRKYRQQQAVSV | 60  |
| Query | 73  | GRADTLESLISNFYGYVLFFFTFAILLQNFMDVTAIISAGVASLAIAFGAQGLVSDVVT   | 132 |
|       |     | GRADTLESLISNFYGYVLFFFTFAILLQNFMDVTAIISAGVASLAIAFGAQGLVSDVVT   |     |
| Sbjct | 61  | GRADTLESLISNFYGYVLFFFTFAILLQNFMDVTAIISAGVASLAIAFGAQGLVSDVVT   | 120 |
| Query | 133 | GFFILLERQLDVGDTITIGLVNGTVEALGLRRTTLVRDFDGLHFIPNRQIMVVSNHSGN   | 192 |
|       |     | GFFILLERQLDVGDTITIGLVNGTVEALGLRRTT VRDFDGLHFIPNRQIMVVSNHSGN   |     |
| Sbjct | 121 | GFFILLERQLDVGDTITIGLVNGTVEALGLRRTTQVRDFDGLHFIPNRQIMVVSNHSGN   | 180 |
| Query | 193 | MRVMVDIQISPHEDEPEKAIKIIGEVCDAKENKNIVEPPVVLGVQNI DATNMIIIRVVGK | 252 |
|       |     | MRVMVDIQISPHEDEPEKAIKIIGEVCDAKENKNIVEPPVVLGVQNI DATNMIIIRVVGK |     |
| Sbjct | 181 | MRVMVDIQISPHEDEPEKAIKIIGEVCDAKENKNIVEPPVVLGVQNI DATNMIIIRVVGK | 240 |
| Query | 253 | AVNGEQYSVQRDLLKDIREALAENKIELPLNFVSTFGPNNN                     | 293 |
|       |     | AVNGEQYSVQRDLLKDIREALAENKIELPLNFVSTFGPNNN                     |     |
| Sbjct | 241 | AVNGEQYSVQRDLLKDIREALAENKIELPLNFVSTFGPNNN                     | 281 |

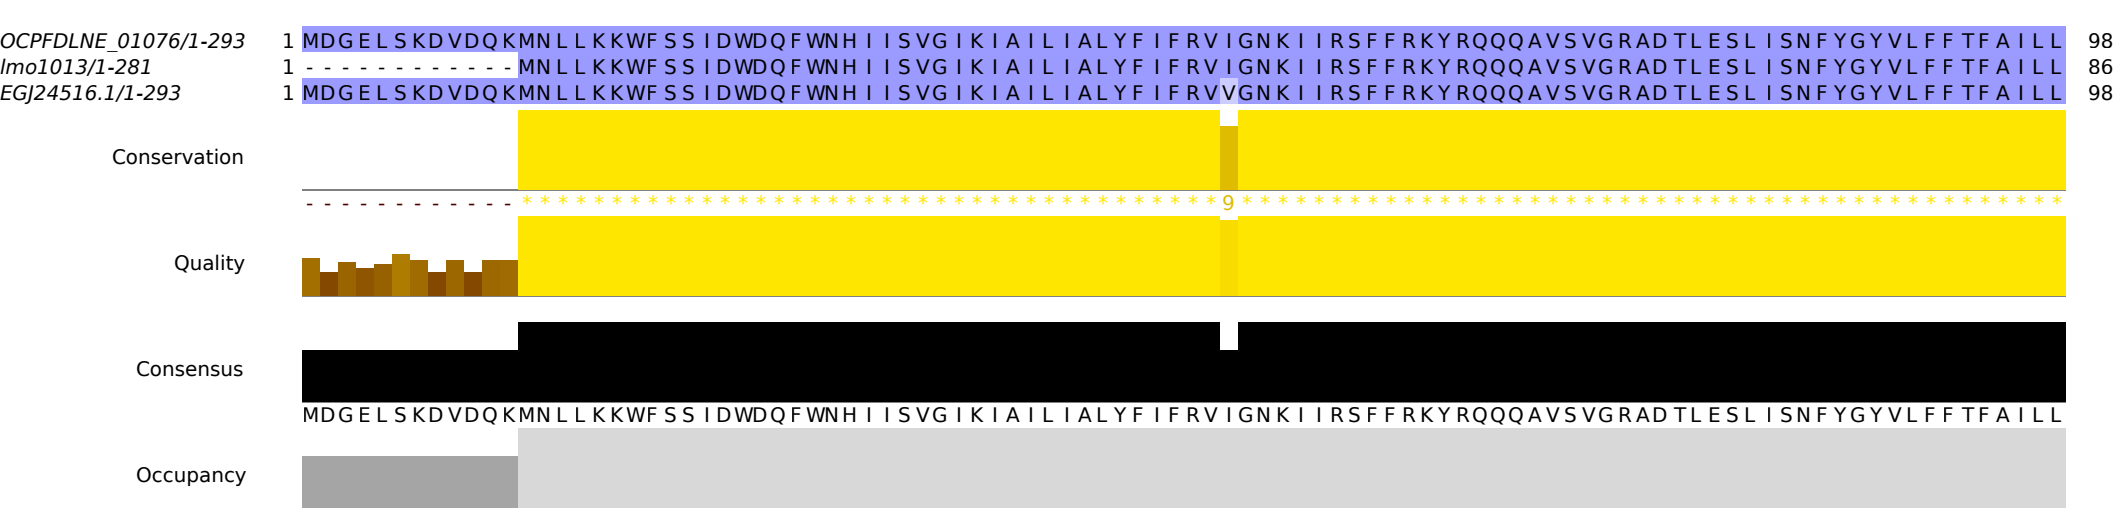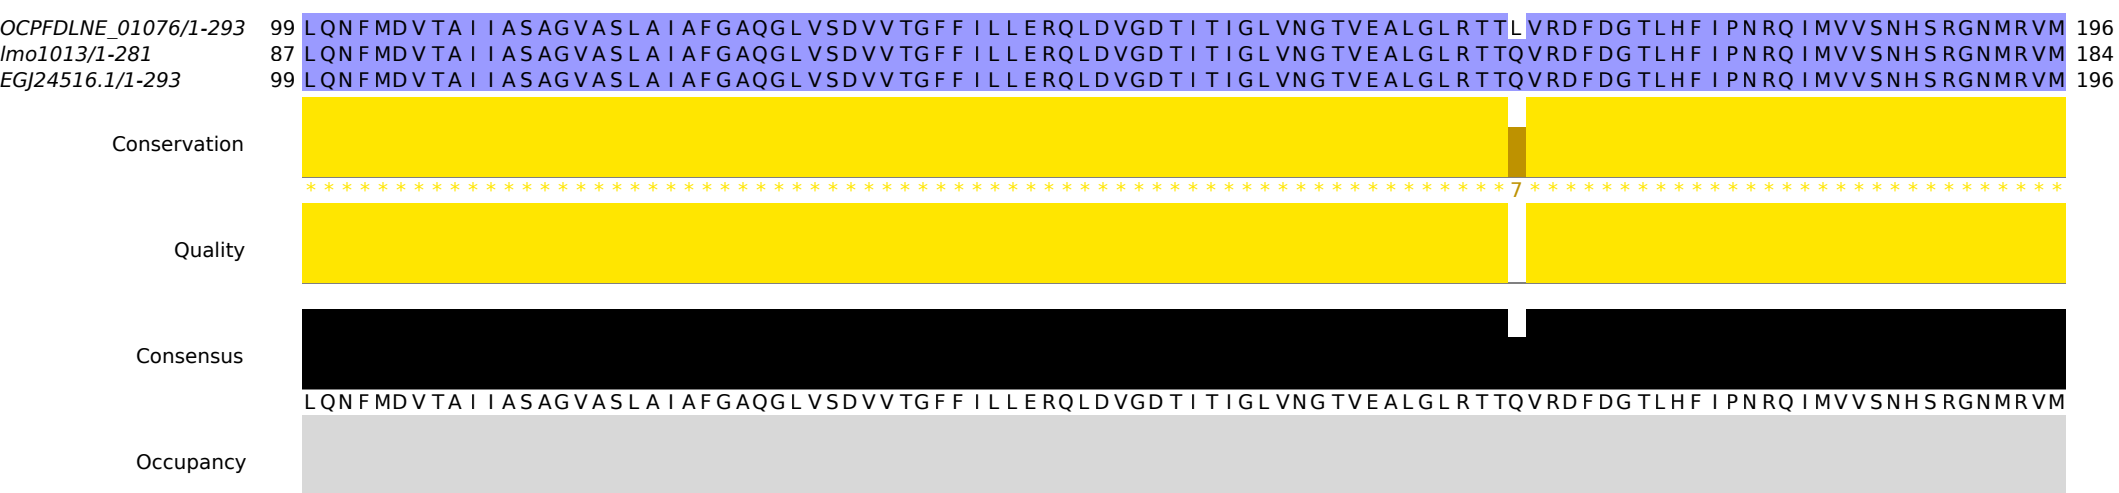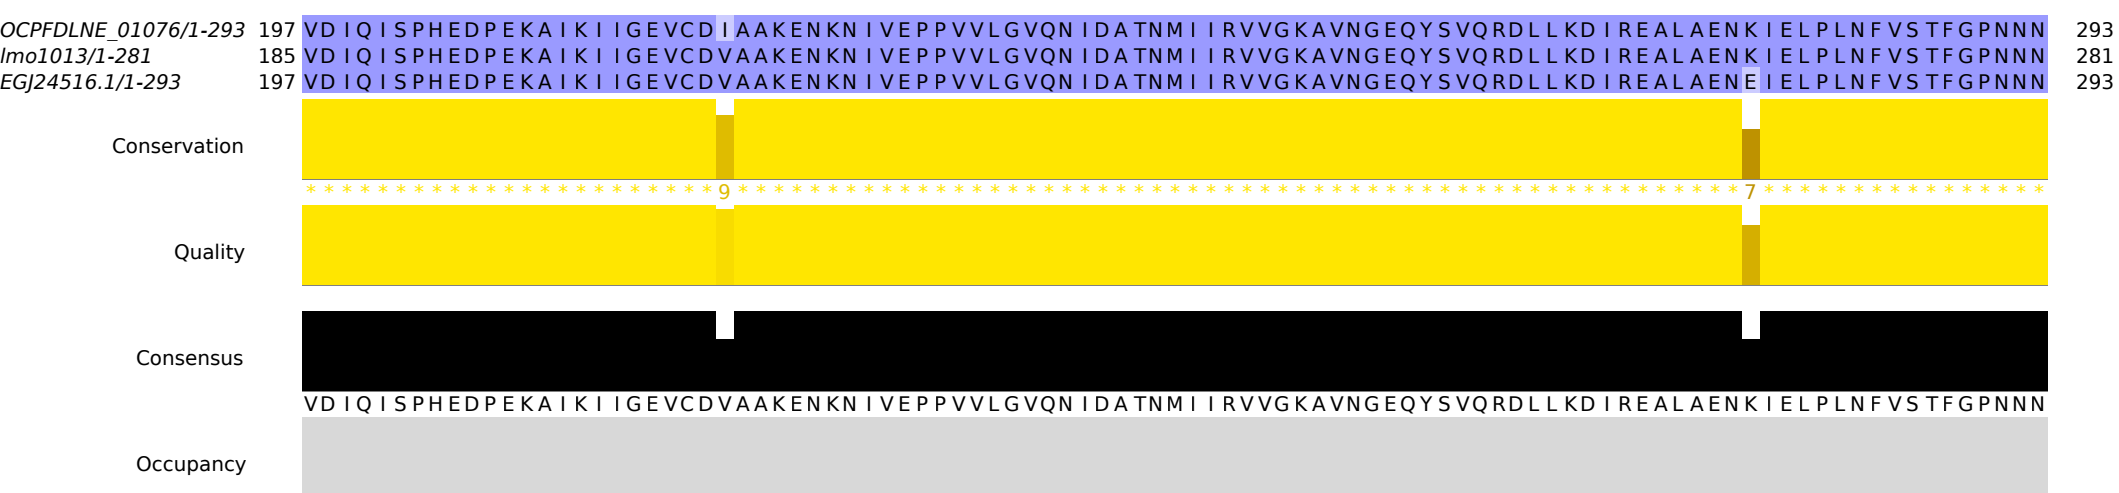

# lmo2229 vs LMOA\_2530 (ScottA) BLASTP alignment

```
>lmo2229
Length=714

Score = 1447 bits (3746), Expect = 0.0, Method: Compositional matrix adjust.
Identities = 711/714 (99%), Positives = 712/714 (99%), Gaps = 2/714 (0%)

Query 1 MDKFKQQLIKYLKLFVGGFIGKWLKSGWQKFRFRWKNKHIGKIFLLAGLVFLLSFIIYLVI 60
MDKFKQQLIKYLKLFVGGFIGKWL+KGWQKFRFRWKNKHIGKIFLLAGLVFLLSFIIYLVI
Sbjct 1 MDKFKQQLIKYLKLFVGGFIGKWLKSGWQKFRFRWKNKHIGKIFLLAGLVFLLSFIIYLVI 60

Query 61 VAKSADIDALKKGGLESATIIYDKDGDKAGELSSTDATFVSDIKISKNLQNAVVSIEDRKF 120
VAKSADIDALKKGGLESATIIYDKDGDKAGELSSTDATFVSDIKISKNLQNAVVSIEDRKF
Sbjct 61 VAKSADIDALKKGGLESATIIYDKDGDKAGELSSTDATFVSDIKISKNLQNAVVSIEDRKF 120

Query 121 YEHKGFDLKGIARAGVNLVTSGGISGGGSTITQQLAKNALLTQEQTFRKAKEIFMAREI 180
YEHKGFDLKGIARAGVNLVTSGGISGGGSTITQQLAKNALLTQEQTFRKAKEIFMAREI
Sbjct 121 YEHKGFDLKGIARAGVNLVTSGGISGGGSTITQQLAKNALLTQEQTFRKAKEIFMAREI 180

Query 181 EKTYSKDEIMEMYLNRSYFGNGEWGVENASLKYFGKSAADLNPEAATIAGLLQAPSAYD 240
EKTYSKDEIMEMYLNRSYFGNGEWGVENASLKYFGKSAADLNPEAATIAGLLQAPSAYD
Sbjct 181 EKTYSKDEIMEMYLNRSYFGNGEWGVENASLKYFGKSAADLNPEAATIAGLLQAPSAYD 240

Query 241 PYQHIDKATNRRNMVLNAMVETGTISKAEGDKYKATKIVLNDQSKDPLANKYPWYVDAVI 300
PYQHIDKATNRRNMVLNAMVETGTISKAEGDKYKATKIVLNDQSKDPLANKYPWYVDAVI
Sbjct 241 PYQHIDKATNRRNMVLNAMVETGTISKAEGDKYKATKIVLNDQSKDPLANKYPWYVDAVI 300

Query 301 NEAVNEADITQDEIMQKGYKIYTELDQNYQTSLENYNNDGLFPSNANDGTLVQSGAVLM 360
NEAVNEADITQDEIMQKGYKIYTELDQNYQTSLENYNNDGLFPSNANDGTLVQSGAVLM
Sbjct 301 NEAVNEADITQDEIMQKGYKIYTELDQNYQTSLENYNNDGLFPSNANDGTLVQSGAVLM 360

Query 361 DPATGGIRALVGGGRGEHVFRGFNRATQMKAQPGSTMKPLAVYTPALQSGYDVDSMLKDEK 420
DPATGGIRALVGGGRGEHVFRGFNRATQMKAQPGSTMKPLAVYTPALQSGYDVDSMLKDEK
Sbjct 361 DPATGGIRALVGGGRGEHVFRGFNRATQMKAQPGSTMKPLAVYTPALQSGYDVDSMLKDEK 420

Query 421 ITYKGNYPPTNVGGVYSGEVPMYKAVANSINAPAVWLLDQIGIDKGKVSVEKFGITVPEK 480
ITYKGNYPPTNVGGVYSGEVPMYKAVANSINAPAVWLLDQIGIDKGKVSVEKFGITVPEK
Sbjct 421 ITYKGNYPPTNVGGVYSGEVPMYKAVANSINAPAVWLLDQIGIDKGKVSVEKFGITVPEK 480

Query 481 DRTLGLALGGMSKASPVEMATAYATFANNGAKPESHIITKIVDPSGNTVYENVPKTKQI 540
DRTLGLALGGMSKASPVEMATAYATFANNGAKPESHIITKIVDPSGNTVYENVPKTKQI
Sbjct 481 DRTLGLALGGMSKASPVEMATAYATFANNGAKPESHIITKIVDPSGNTVYENVPKTKQI 540

Query 541 ISETVSNEMTSMLLDVINTGTGQSAAVSGHEMAGKTGSTQVPFDDTSGTKDQWVFGYTPN 600
ISETVSNEMTSMLLDVINTGTGQSAAVSGHEMAGKTGSTQVPFDDTSGTKDQWVFGYTPN
Sbjct 541 ISETVSNEMTSMLLDVINTGTGQSAAVSGHEMAGKTGSTQVPFDDTSGTKDQWVFGYTPN 600

Query 601 LVGAVWMGYDKTDKEHYLTTTSSAGVSSLAHYVMNSGLQYQKSADFSTKSAAQETAACKK 659
LVGAVWMGYDKTDKEHYLTTTSSAGVSSLAHYVMNSGLQYQKSADFSTKSAAQETAACKK
Sbjct 601 LVGAVWMGYDKTDKEHYLTTTSSAGVSSLAHYVMNSGLQYQKSADFSTKSAAQETAACKK 660

Query 660 -EEKEKNSGSDFWSGVKEKADEAGETIKKGADKVKEFGGKVSVDGIGNLIDSIGN 712
EEKEKNSGSDFWSGVKEKADEAGETIKKGADKVKEFGGKVSVDGIGNLIDSIGN
Sbjct 661 EEEKEKNSGSDFWSGVKEKADEAGETIKKGADKVKEFGGKVSVDGIGNLIDSIGN 714
```

# lmo2229 vs OCPFDLNE\_02389 (RO15) BLASTP alignment

```
>lmo2229
Length=714

Score = 1457 bits (3772), Expect = 0.0, Method: Compositional matrix adjust.
Identities = 714/714 (100%), Positives = 714/714 (100%), Gaps = 0/714 (0%)

Query 1 MDKFKQQLIKYLKLFVGGFIGKWLKSGWQKFRFRWKNKHIGKIFLLAGLVFLLSFIIYLVI 60
MDKFKQQLIKYLKLFVGGFIGKWLKSGWQKFRFRWKNKHIGKIFLLAGLVFLLSFIIYLVI
Sbjct 1 MDKFKQQLIKYLKLFVGGFIGKWLKSGWQKFRFRWKNKHIGKIFLLAGLVFLLSFIIYLVI 60

Query 61 VAKSADIDALKKGGLESATIIYDKDGDKAGELSSTDATFVSDIKISKNLQNAVVSIEDRKF 120
VAKSADIDALKKGGLESATIIYDKDGDKAGELSSTDATFVSDIKISKNLQNAVVSIEDRKF
Sbjct 61 VAKSADIDALKKGGLESATIIYDKDGDKAGELSSTDATFVSDIKISKNLQNAVVSIEDRKF 120

Query 121 YEHKGFDLKGIARAGVNLVTSGGISGGGSTITQQLAKNALLTQEQTFRKAKEIFMAREI 180
YEHKGFDLKGIARAGVNLVTSGGISGGGSTITQQLAKNALLTQEQTFRKAKEIFMAREI
Sbjct 121 YEHKGFDLKGIARAGVNLVTSGGISGGGSTITQQLAKNALLTQEQTFRKAKEIFMAREI 180

Query 181 EKTYSKDEIMEMYLNRSYFGNGEWGVENASLKYFGKSAADLNPEAATIAGLLQAPSAYD 240
EKTYSKDEIMEMYLNRSYFGNGEWGVENASLKYFGKSAADLNPEAATIAGLLQAPSAYD
Sbjct 181 EKTYSKDEIMEMYLNRSYFGNGEWGVENASLKYFGKSAADLNPEAATIAGLLQAPSAYD 240

Query 241 PYQHIDKATNRRNMVLNAMVETGTISKAEGDKYKATKIVLNDQSKDPLANKYPWYVDAVI 300
PYQHIDKATNRRNMVLNAMVETGTISKAEGDKYKATKIVLNDQSKDPLANKYPWYVDAVI
Sbjct 241 PYQHIDKATNRRNMVLNAMVETGTISKAEGDKYKATKIVLNDQSKDPLANKYPWYVDAVI 300

Query 301 NEAVNEADITQDEIMQKGYKIYTELDQNYQTSLENYNNDGLFPSNANDGTLVQSGAVLM 360
NEAVNEADITQDEIMQKGYKIYTELDQNYQTSLENYNNDGLFPSNANDGTLVQSGAVLM
Sbjct 301 NEAVNEADITQDEIMQKGYKIYTELDQNYQTSLENYNNDGLFPSNANDGTLVQSGAVLM 360

Query 361 DPATGGIRALVGGGRGEHVFRGFNRATQMKAQPGSTMKPLAVYTPALQSGYDVDSMLKDEK 420
DPATGGIRALVGGGRGEHVFRGFNRATQMKAQPGSTMKPLAVYTPALQSGYDVDSMLKDEK
Sbjct 361 DPATGGIRALVGGGRGEHVFRGFNRATQMKAQPGSTMKPLAVYTPALQSGYDVDSMLKDEK 420

Query 421 ITYKGNYPPTNVGGVYSGEVPMYKAVANSINAPAVWLLDQIGIDKGKVSVEKFGITVPEK 480
ITYKGNYPPTNVGGVYSGEVPMYKAVANSINAPAVWLLDQIGIDKGKVSVEKFGITVPEK
Sbjct 421 ITYKGNYPPTNVGGVYSGEVPMYKAVANSINAPAVWLLDQIGIDKGKVSVEKFGITVPEK 480

Query 481 DRTLGLALGGMSKASPVEMATAYATFANNGAKPESHIITKIVDPSGNTVYENVPKTKQI 540
DRTLGLALGGMSKASPVEMATAYATFANNGAKPESHIITKIVDPSGNTVYENVPKTKQI
Sbjct 481 DRTLGLALGGMSKASPVEMATAYATFANNGAKPESHIITKIVDPSGNTVYENVPKTKQI 540

Query 541 ISETVSNEMTSMLLDVINTGTGQSAAVSGHEMAGKTGSTQVPFDDTSGTKDQWVFGYTPN 600
ISETVSNEMTSMLLDVINTGTGQSAAVSGHEMAGKTGSTQVPFDDTSGTKDQWVFGYTPN
Sbjct 541 ISETVSNEMTSMLLDVINTGTGQSAAVSGHEMAGKTGSTQVPFDDTSGTKDQWVFGYTPN 600

Query 601 LVGAVWMGYDKTDKEHYLTTTSSAGVSSLAHYVMNSGLQYQKSADFSTKSAAQETAACKK 660
LVGAVWMGYDKTDKEHYLTTTSSAGVSSLAHYVMNSGLQYQKSADFSTKSAAQETAACKK
Sbjct 601 LVGAVWMGYDKTDKEHYLTTTSSAGVSSLAHYVMNSGLQYQKSADFSTKSAAQETAACKK 660

Query 661 EEEKEKNSGSDFWSGVKEKADEAGETIKKGADKVKEFGGKVSVDGIGNLIDSIGN 714
EEEKEKNSGSDFWSGVKEKADEAGETIKKGADKVKEFGGKVSVDGIGNLIDSIGN
Sbjct 661 EEEKEKNSGSDFWSGVKEKADEAGETIKKGADKVKEFGGKVSVDGIGNLIDSIGN 714
```

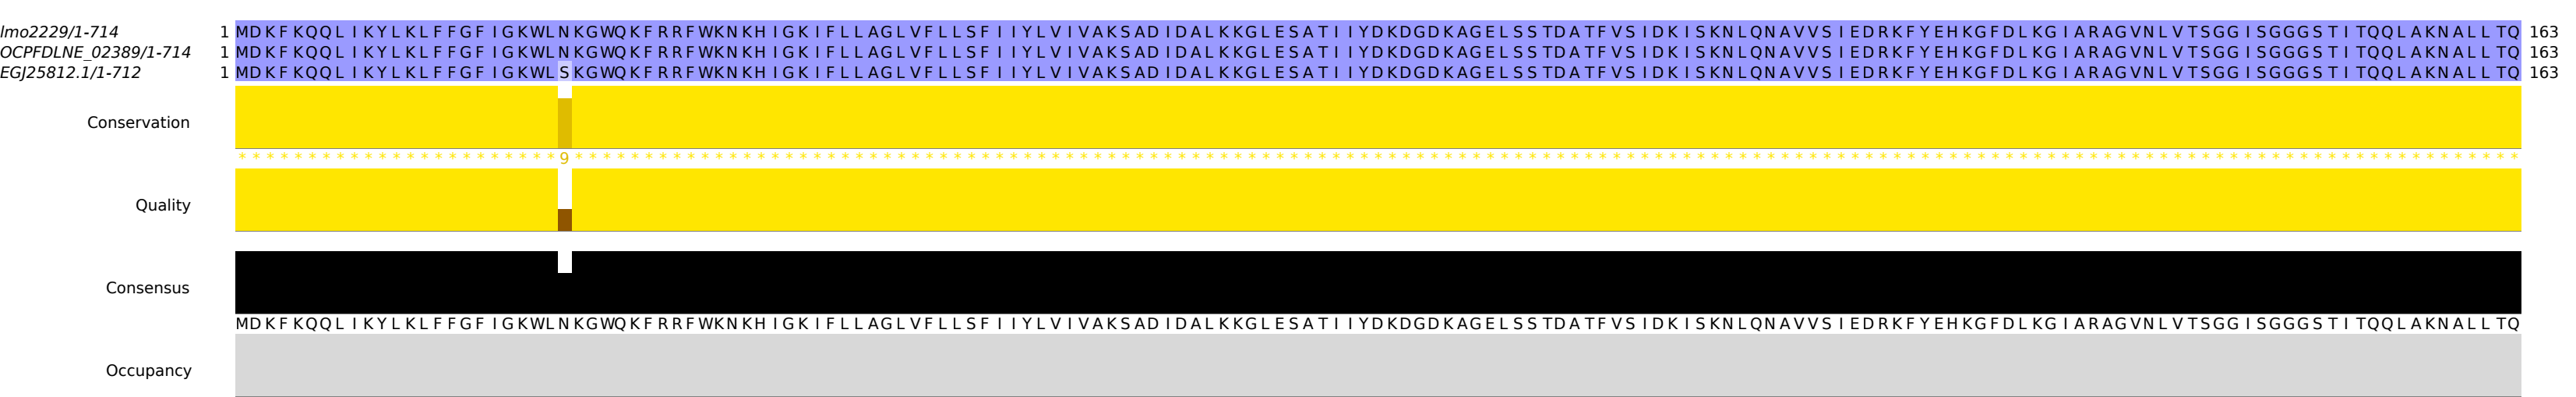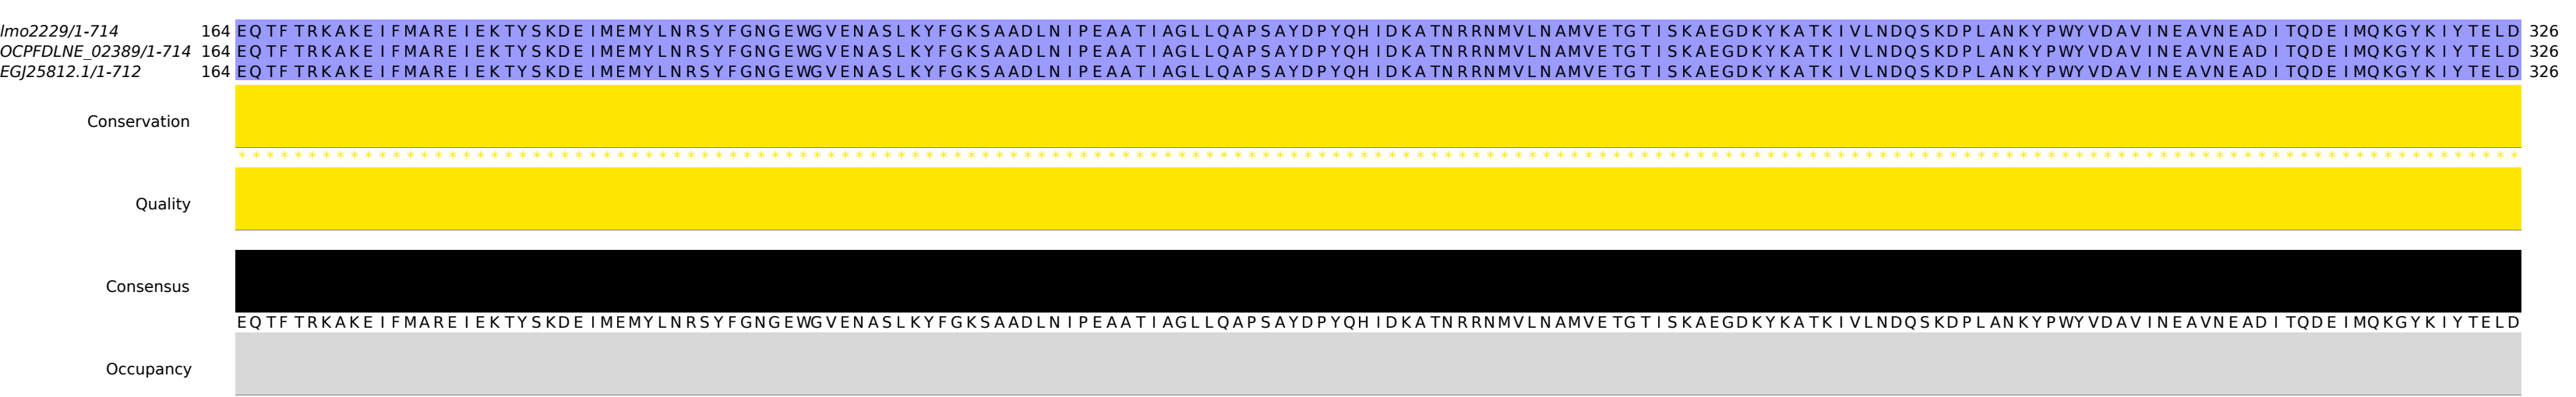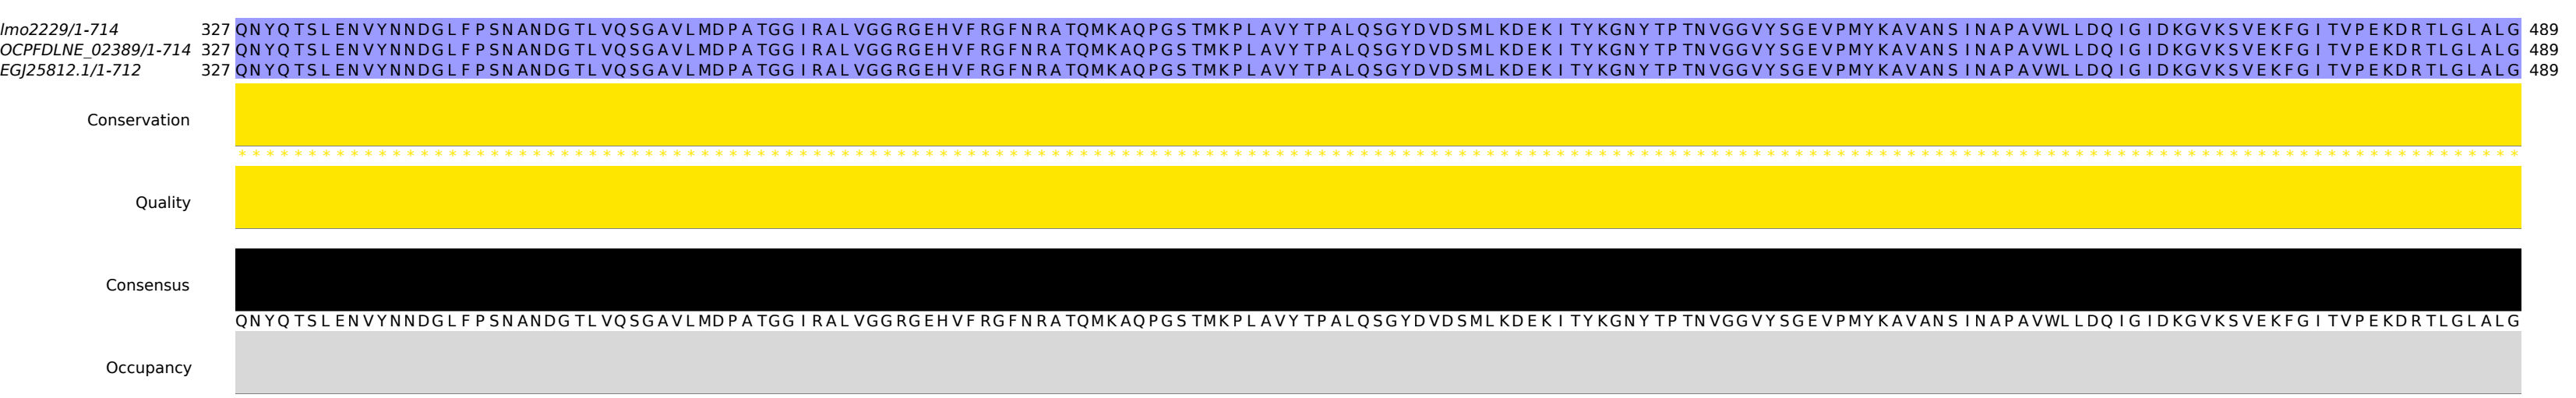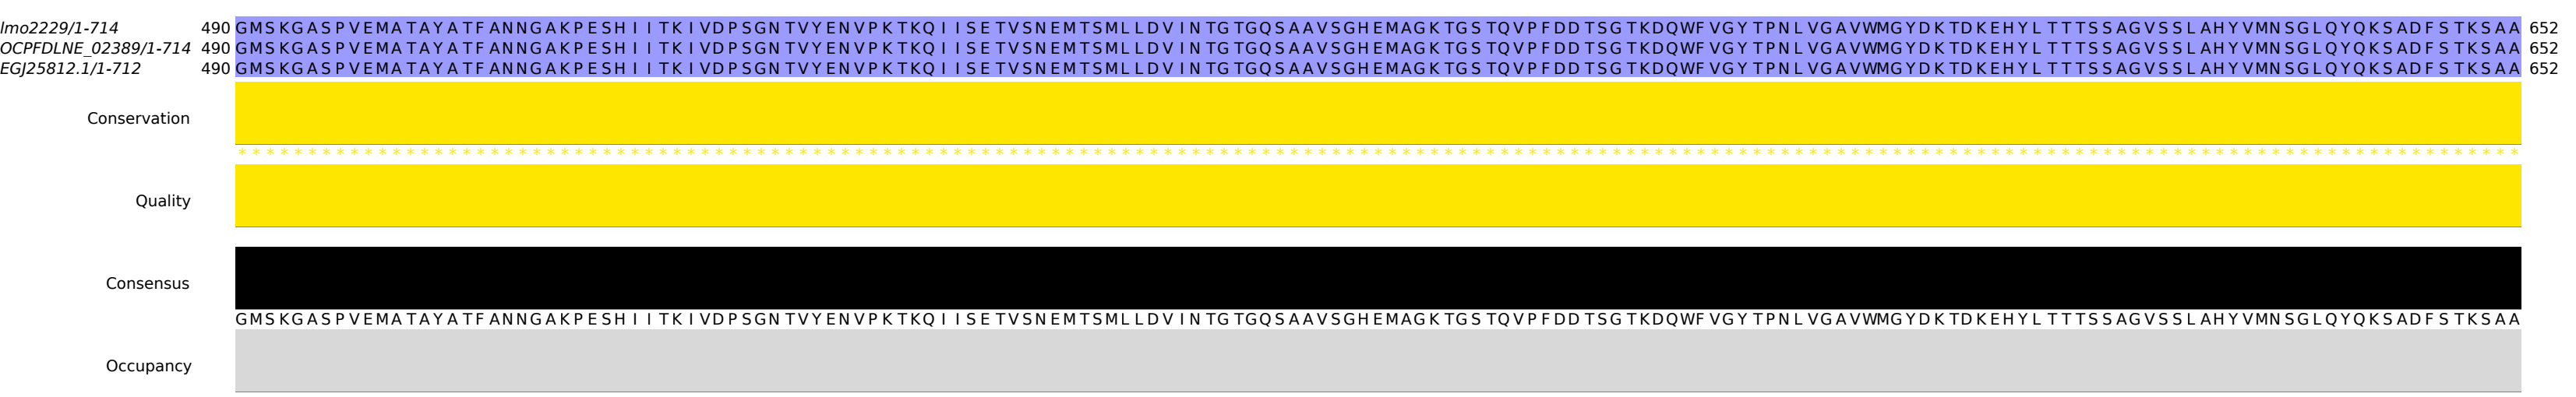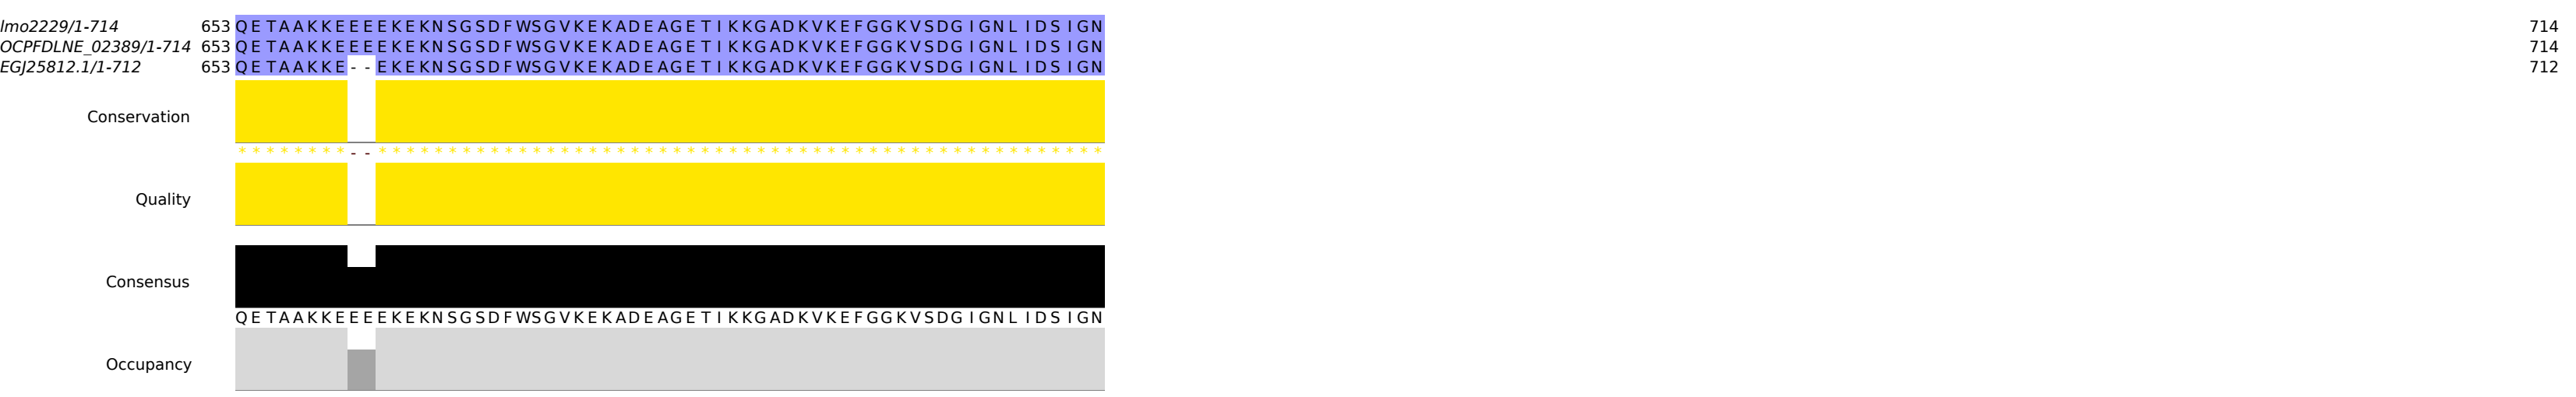

Supplement: 12864_2021_7407_MOESM15_ESM.pdf [file 12864_2021_7407_MOESM15_ESM.pdf]
