# Supplementary material for: High-pressure processing-induced transcriptome response during recovery of Listeria monocytogenes
Source: PubMed Central journal article supplement (PMC7881616; doi:10.1186/s12864-021-07407-6), 2021-02-12

**a) RO15 all samples**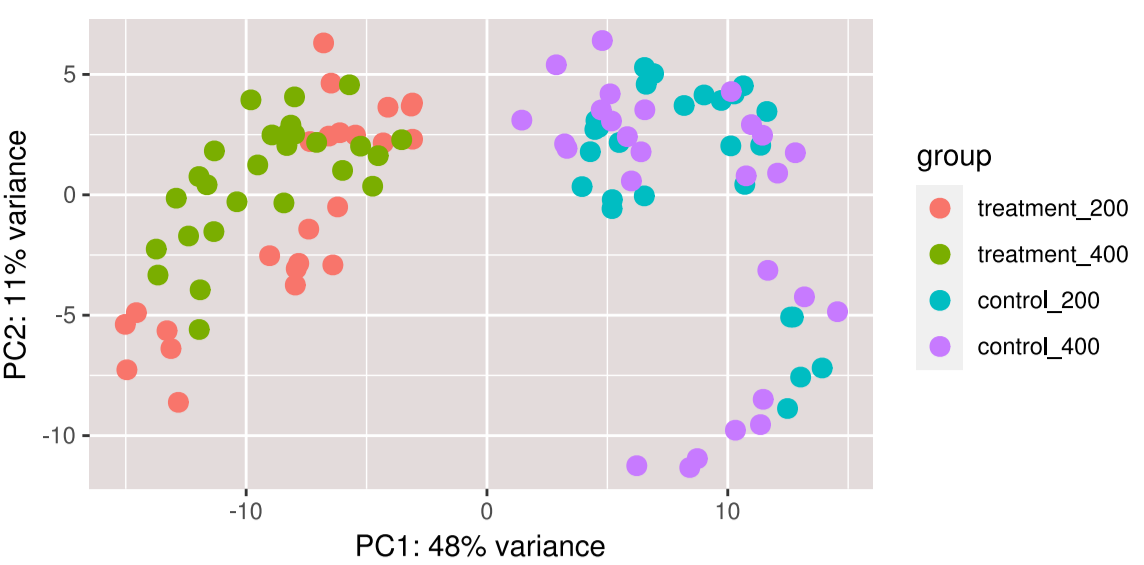**b) ScottA all samples**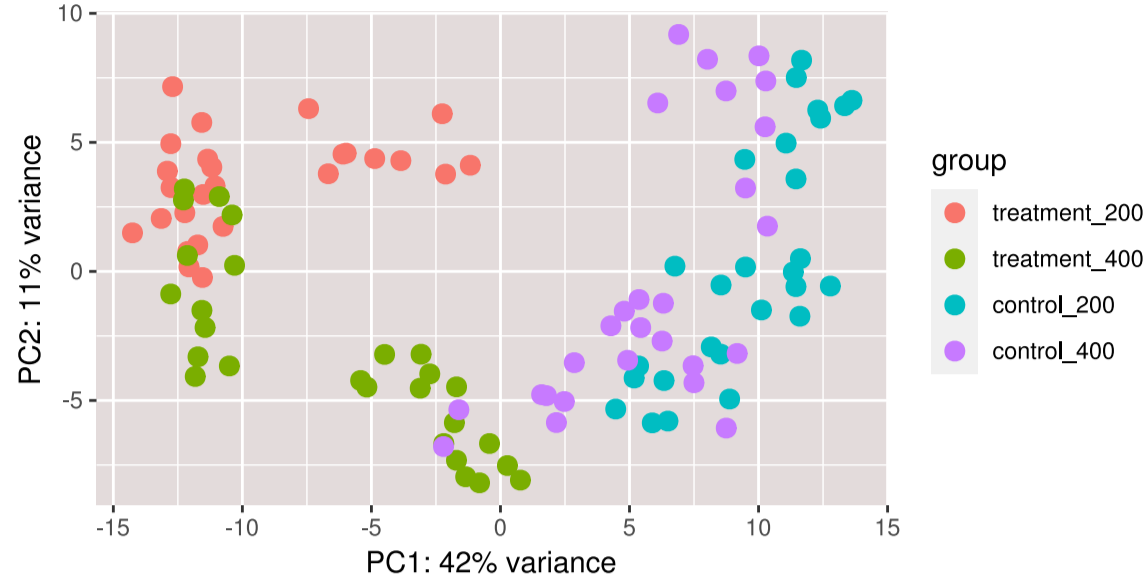**c) 200MPa RO15 samples**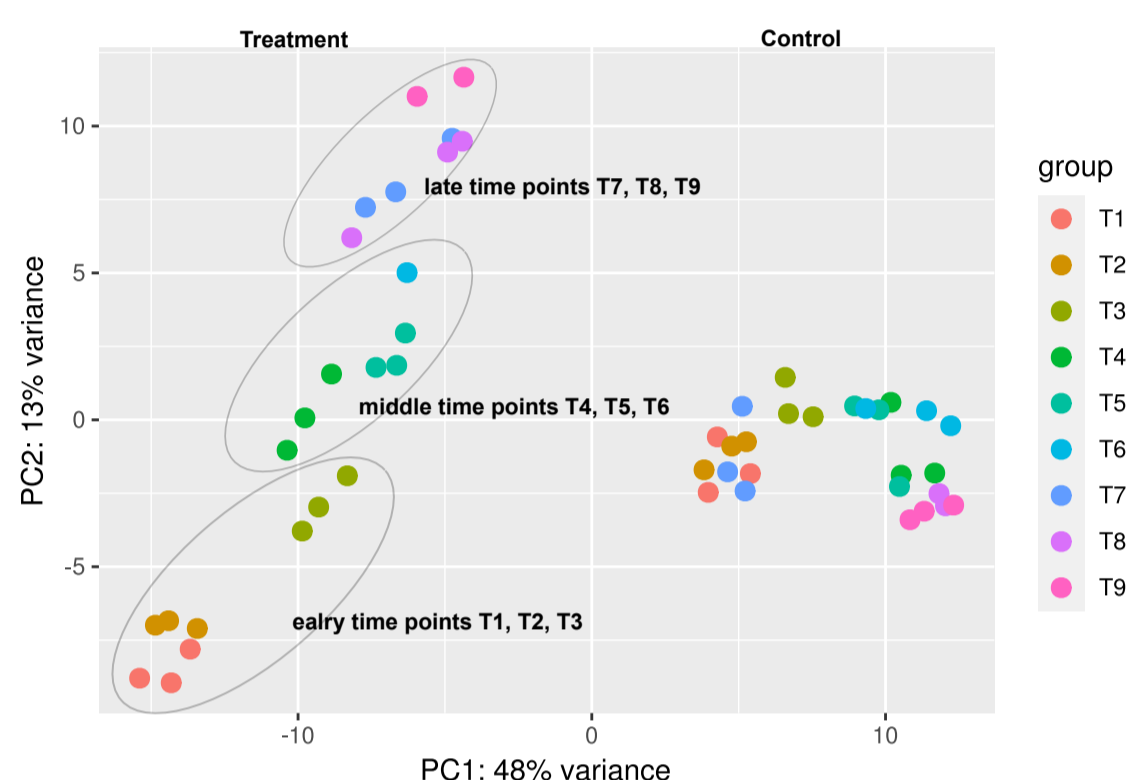**d) 400MPa RO15 samples**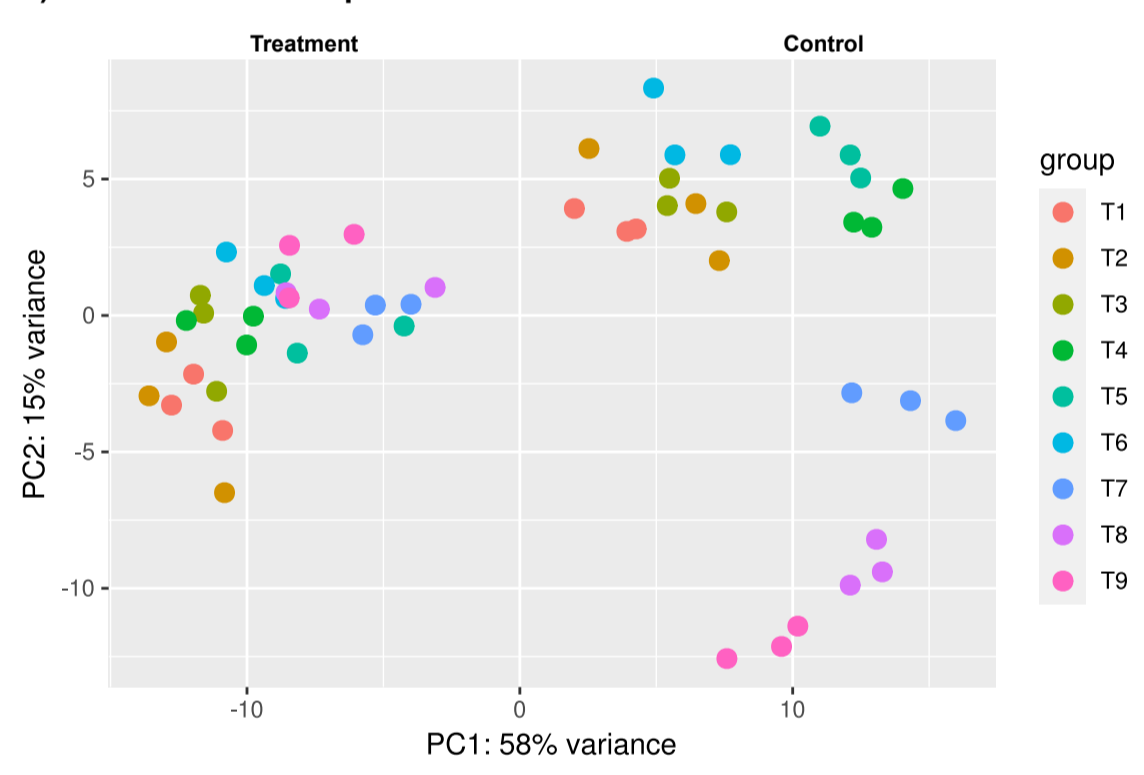**e) 200MPa ScottA samples**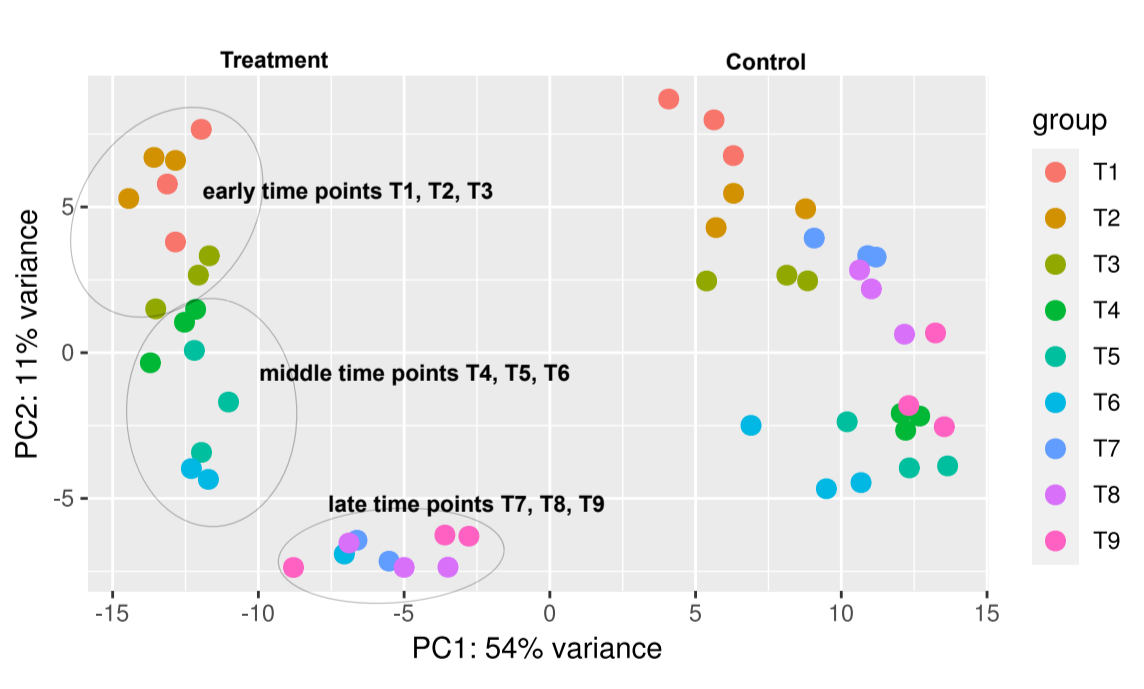**f) 400MPa ScottA samples**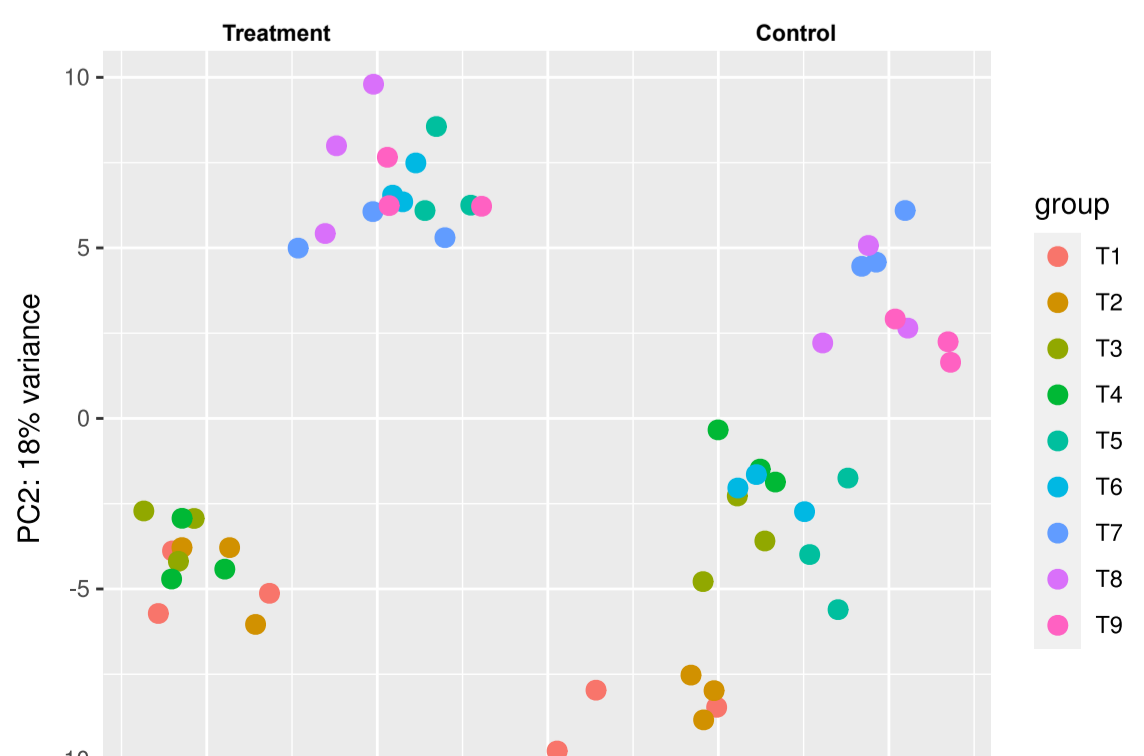

Supplement: 12864_2021_7407_MOESM1_ESM.pdf [file 12864_2021_7407_MOESM1_ESM.pdf]
