# Supplementary material for: High-pressure processing-induced transcriptome response during recovery of Listeria monocytogenes
Source: PubMed Central journal article supplement (PMC7881616; doi:10.1186/s12864-021-07407-6), 2021-02-12

# recG normalized ddPCR / RNA-Seq correlation (400 MPa, 10 min)

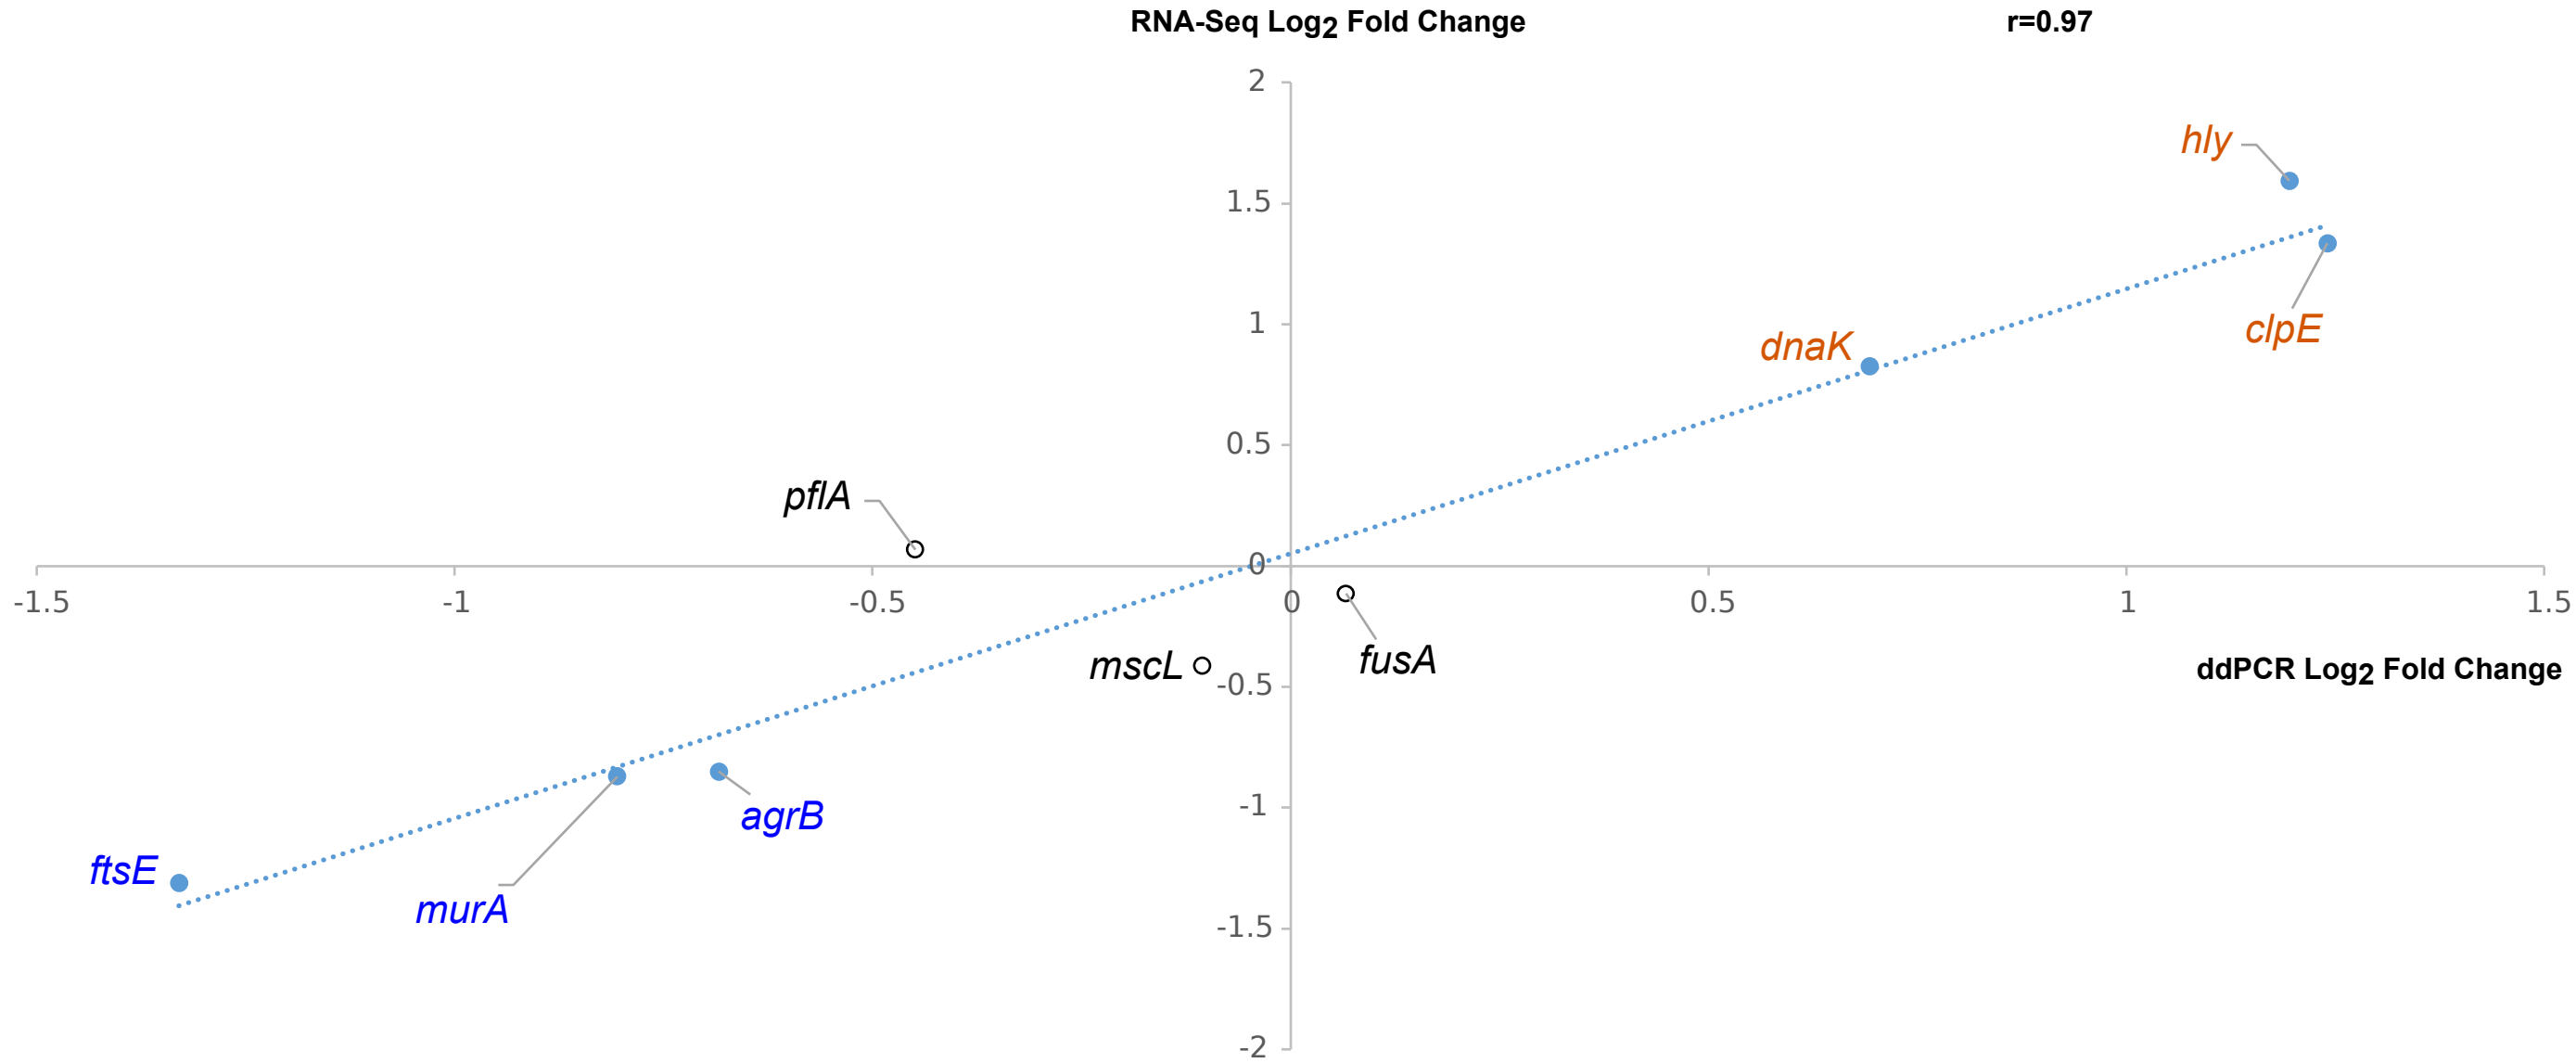

Supplement: 12864_2021_7407_MOESM10_ESM.pdf [file 12864_2021_7407_MOESM10_ESM.pdf]
