# Supplementary material for: High-pressure processing-induced transcriptome response during recovery of Listeria monocytogenes
Source: PubMed Central journal article supplement (PMC7881616; doi:10.1186/s12864-021-07407-6), 2021-02-12

a)

DNA sequencing reads for Imo1013 mutant

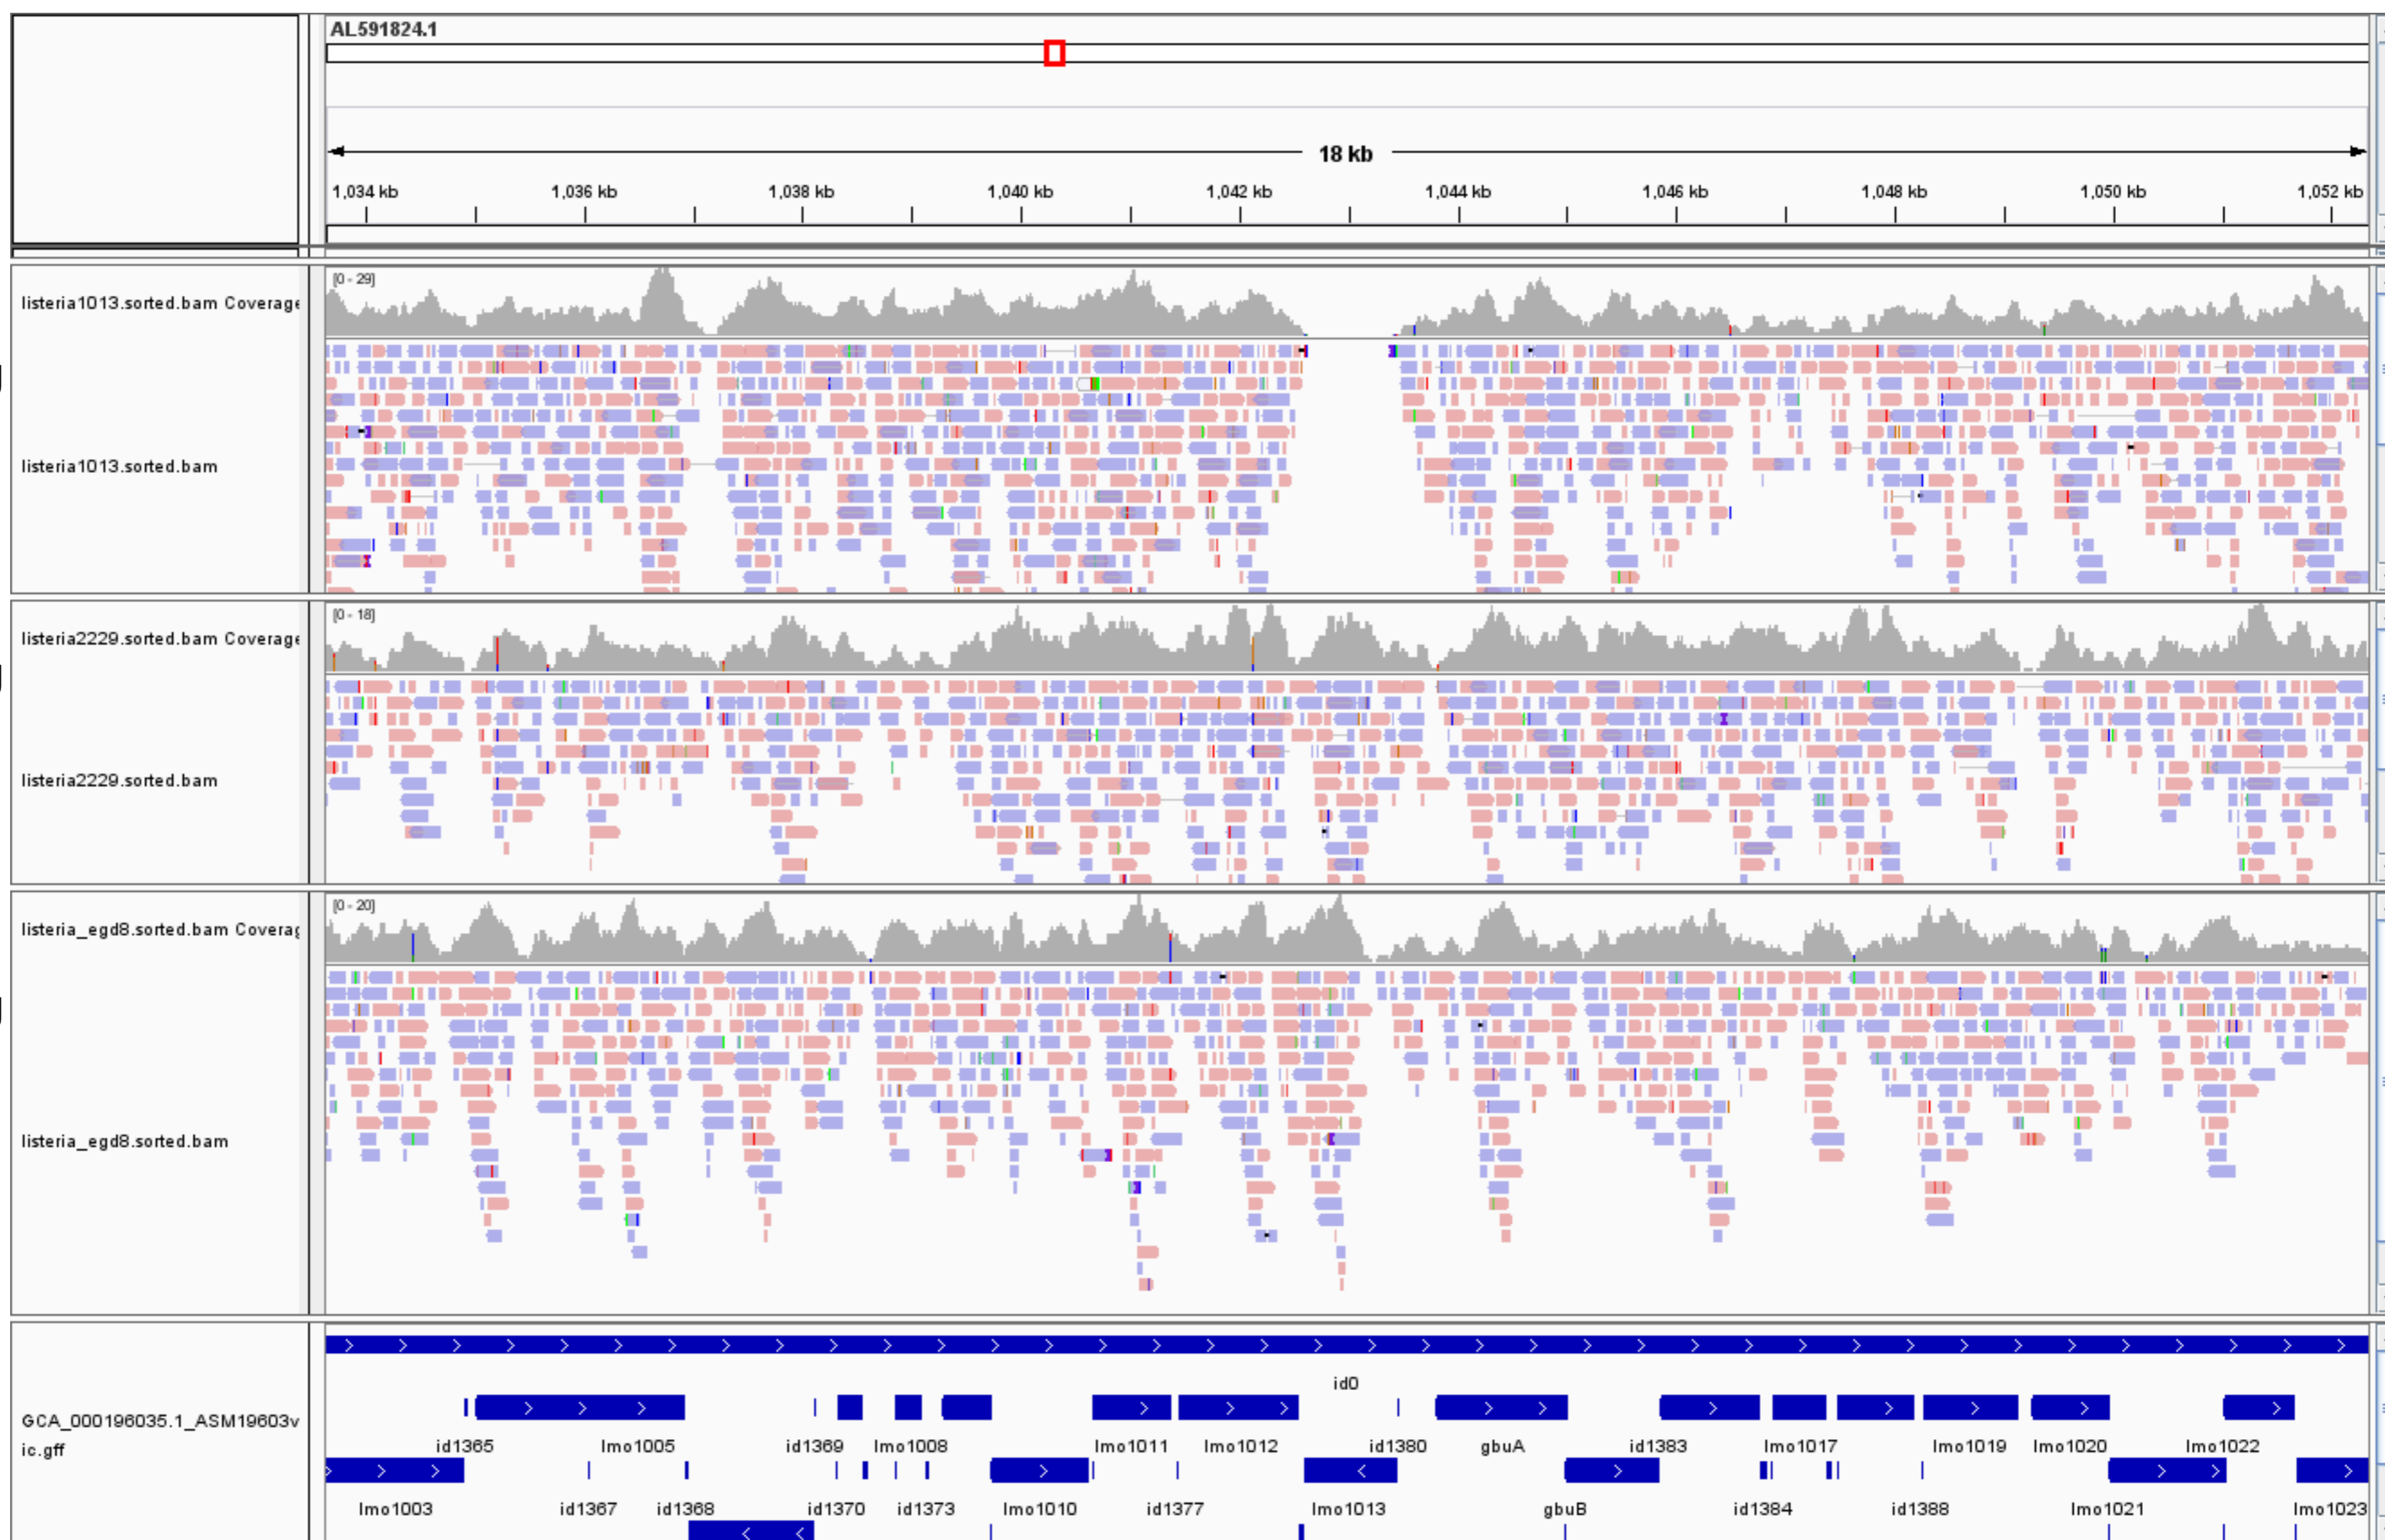

b)

DNA sequencing reads for Imo1013 mutant

DNA sequencing reads for Imo2229 mutant

DNA sequencing reads for wild-type EGDe

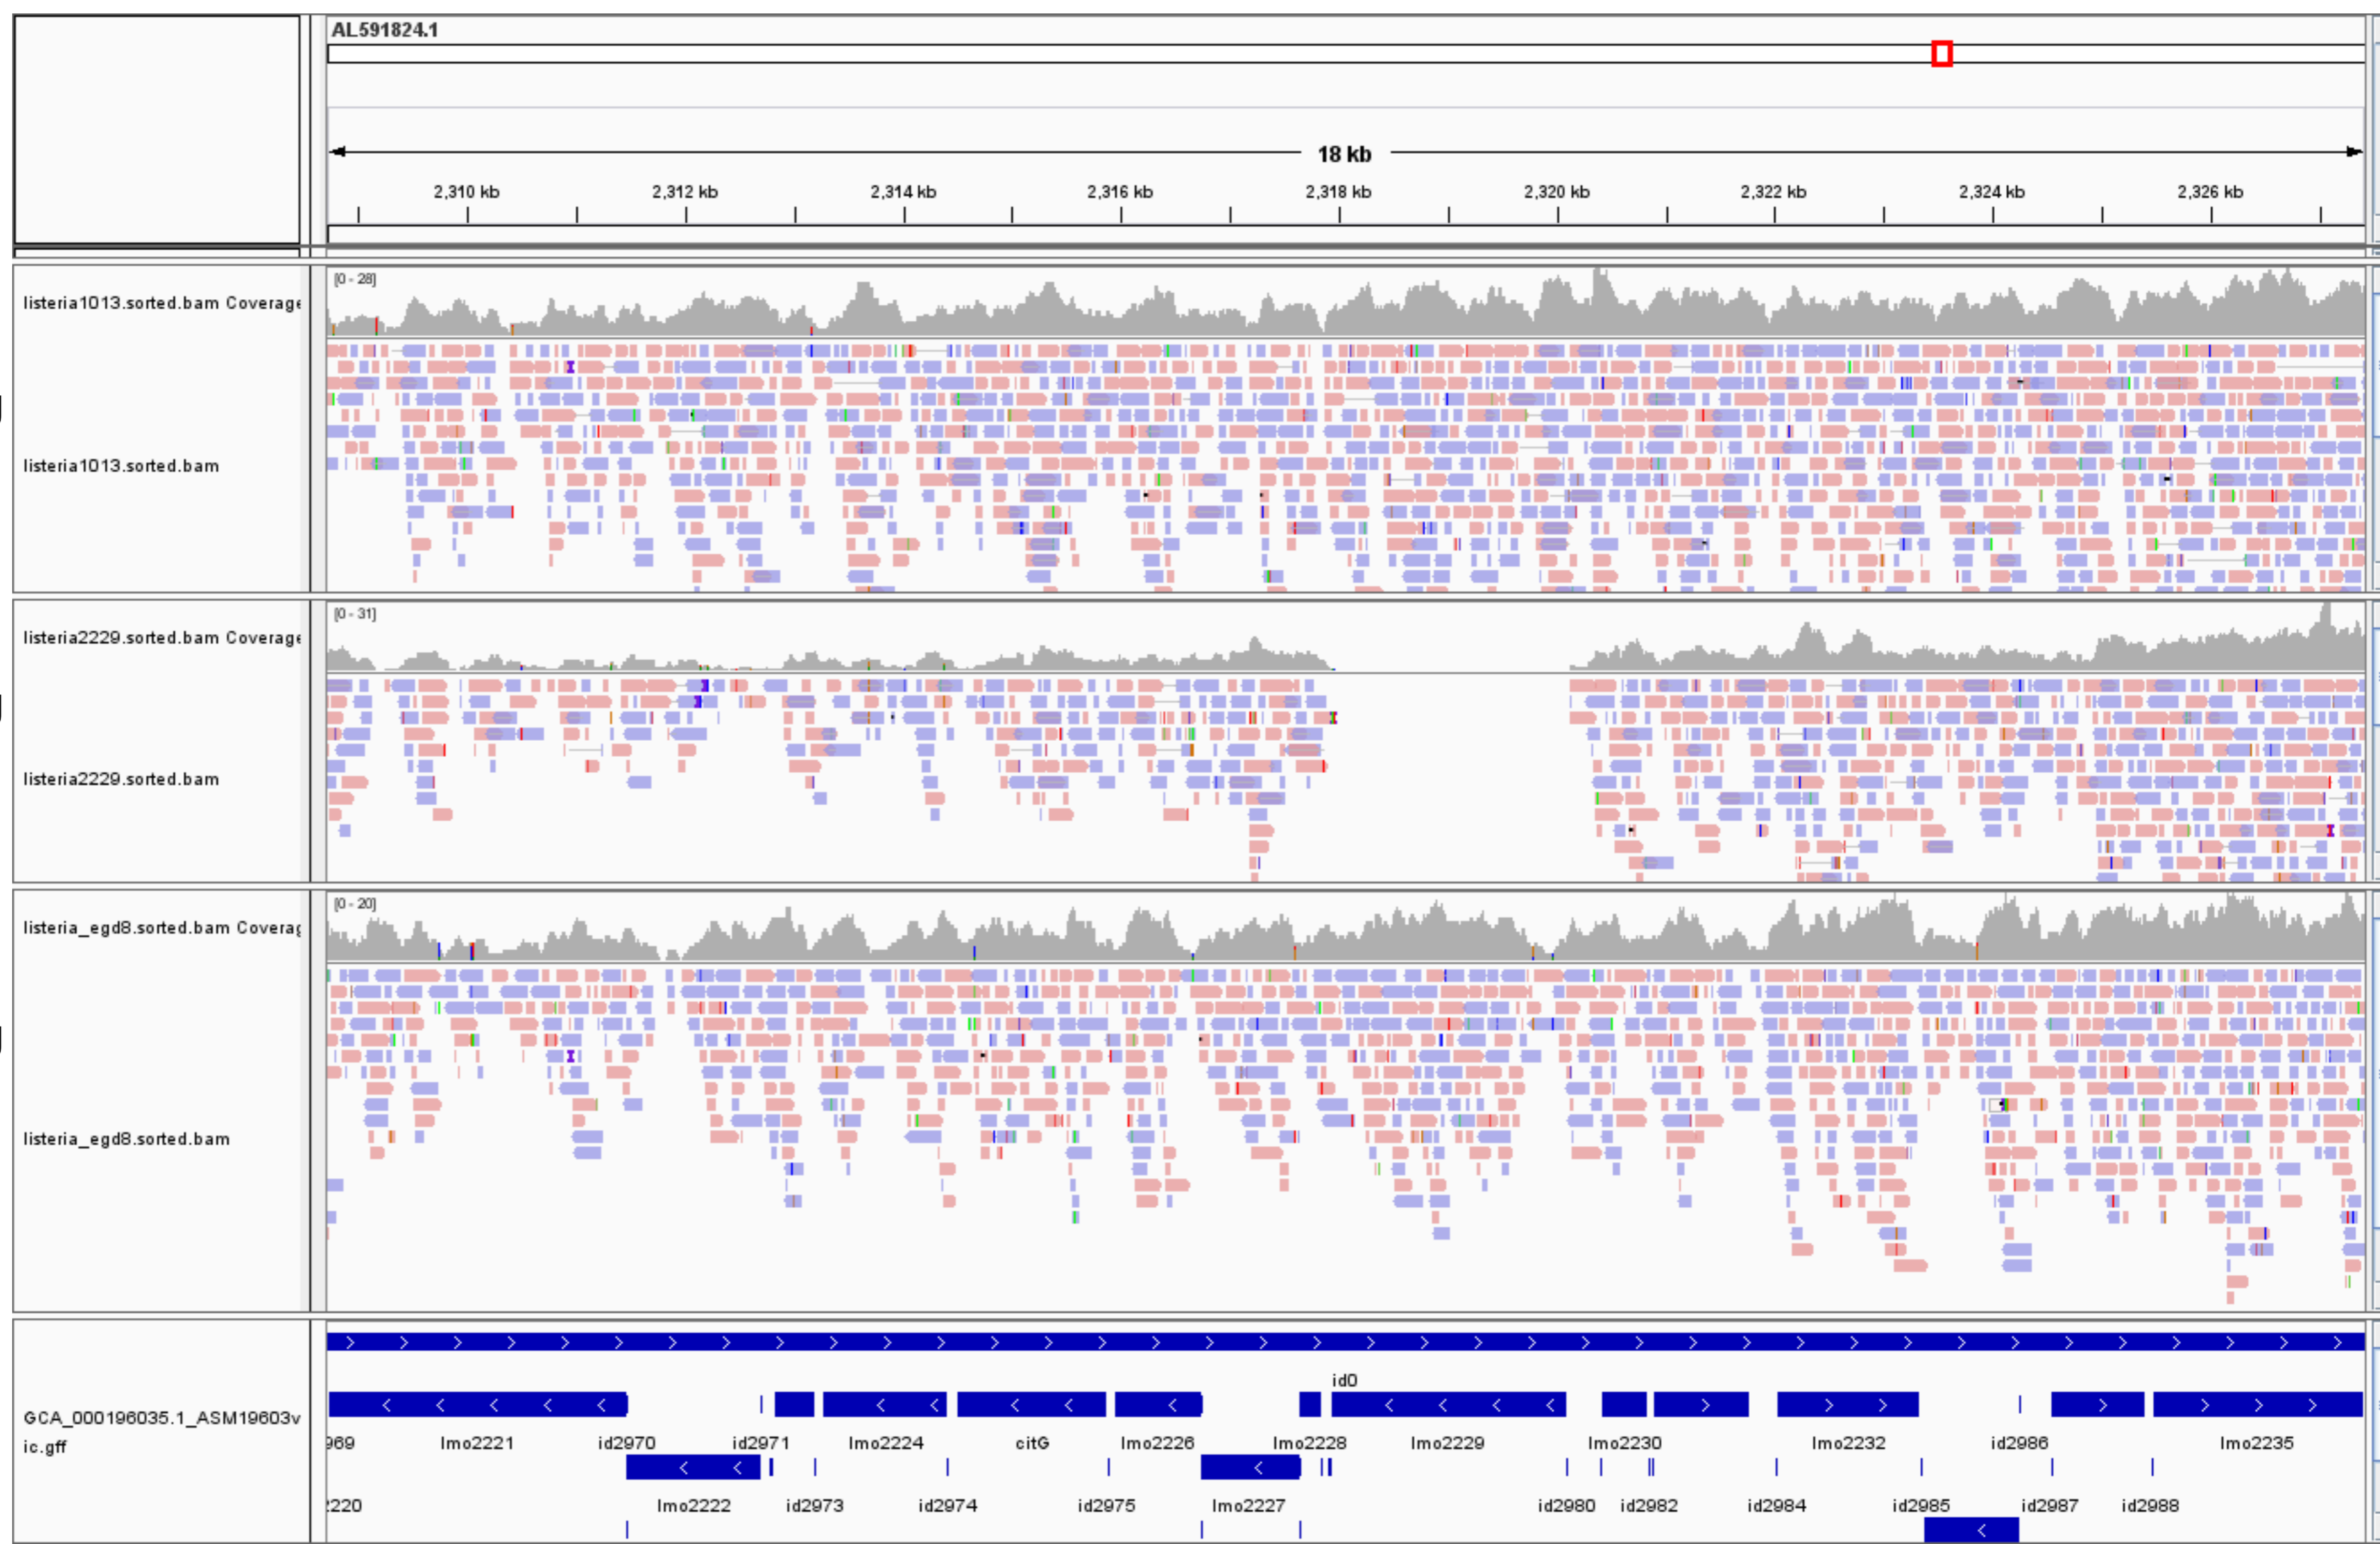

Supplement: 12864_2021_7407_MOESM12_ESM.pdf [file 12864_2021_7407_MOESM12_ESM.pdf]
